# Supplementary material
Source: PubMed Central journal article supplement (PMC6851338)

K. DSGNIPEAIAS [+203]YR. T z=2, scan#=15963, scan time=40.0871

Intensity

8.00e+04  
6.00e+04  
4.00e+04  
2.00e+04  
0.00e+00

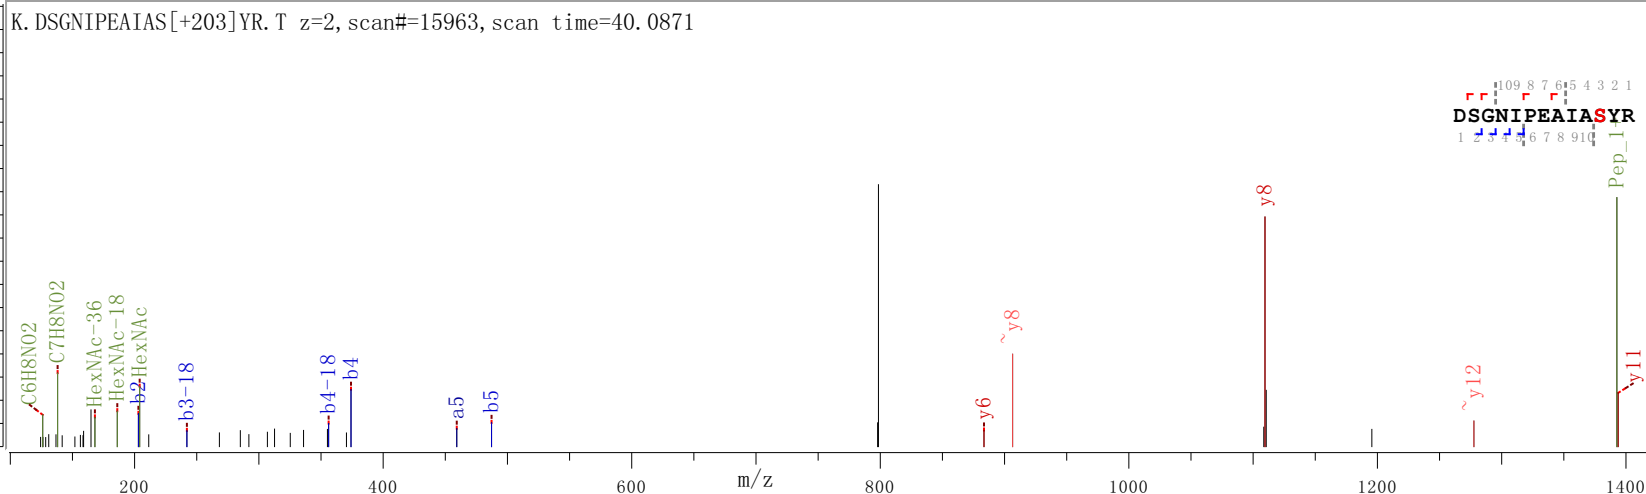

DSGNIPEAIAS~~Y~~R  
1 2 3 4 5 6 7 8 9 10 11

R. IS[+203]PTFADAYSNMGNTLK. E z=2, scan#=26066, scan time=51.5346

Intensity

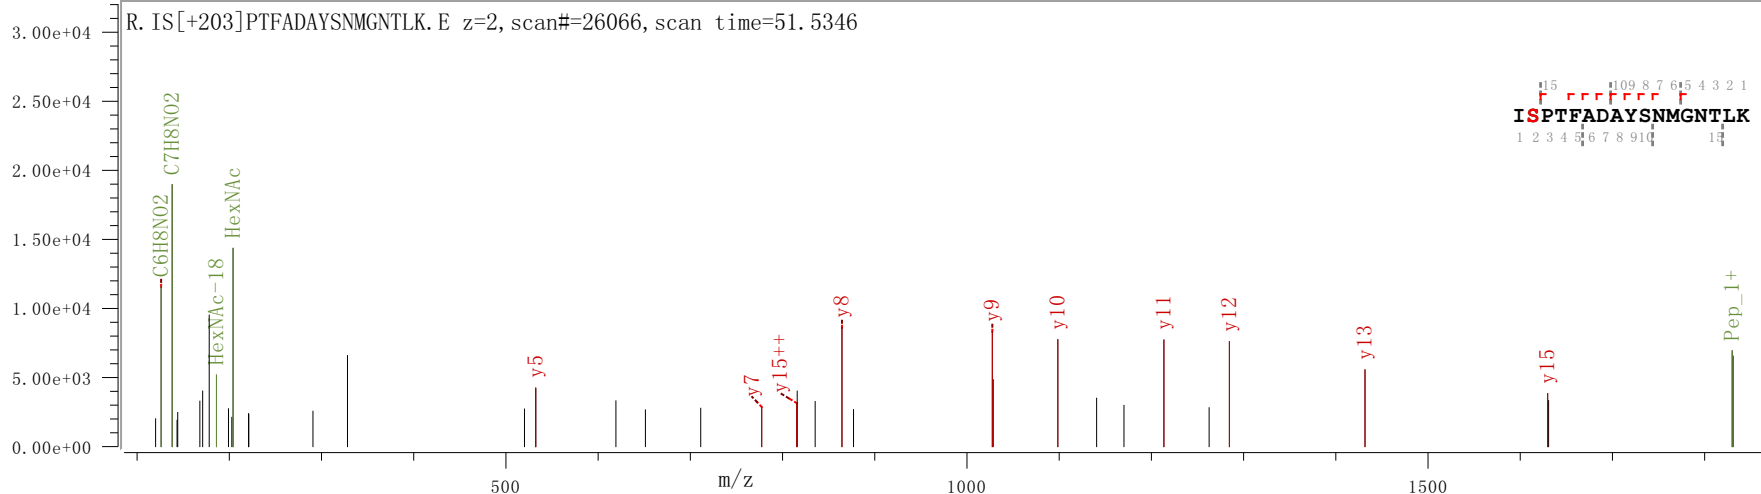

R. AIQINPAFADAHS [+203]NLASIHK. D z=3, scan#=21424, scan time=44.3859

Intensity

1.50e+05  
1.00e+05  
5.00e+04  
0.00e+00

20 15 10 9 8 7 6 5 4 3 2 1  
AIQINPAFADAHSNLASIHK  
1 2 3 4 5 6 7 8 9 10 11 12 13 14 15 16 17 18 19 20

C7H8N02

a2

b2

HexNAc

y2

b3

y4

~y12++

y6

~y16++

~y8

~y17++

~y9

~y10

~y11

~y12

500

1000

m/z

1500

2000

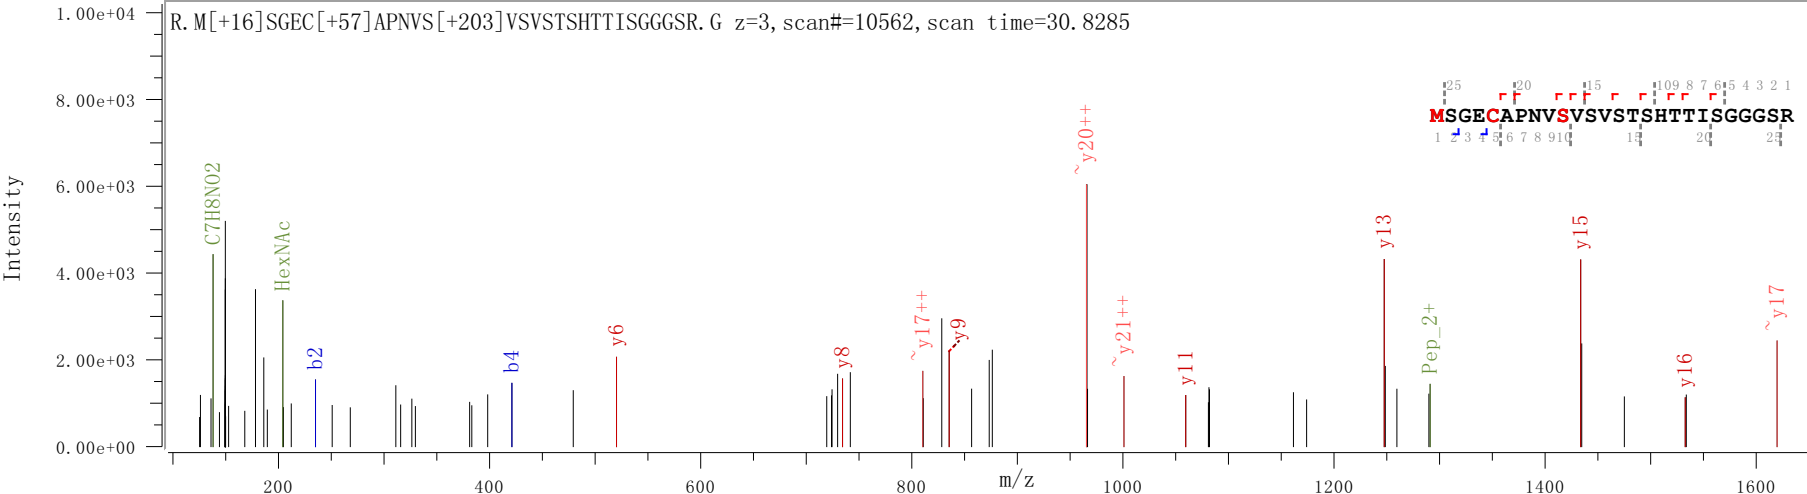

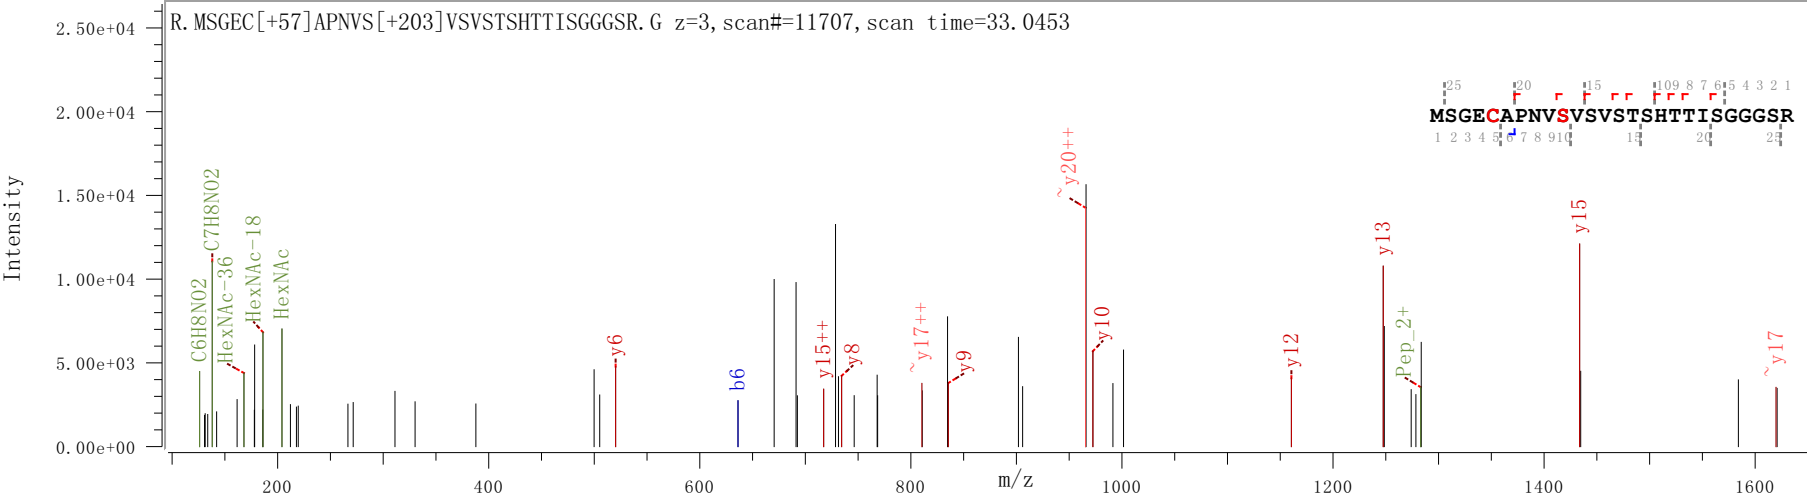

R. MSGEC[+57]APNVSVS[+203]VSTSHTTISGGGSR. G z=3, scan#=14513, scan time=33.2489

Intensity

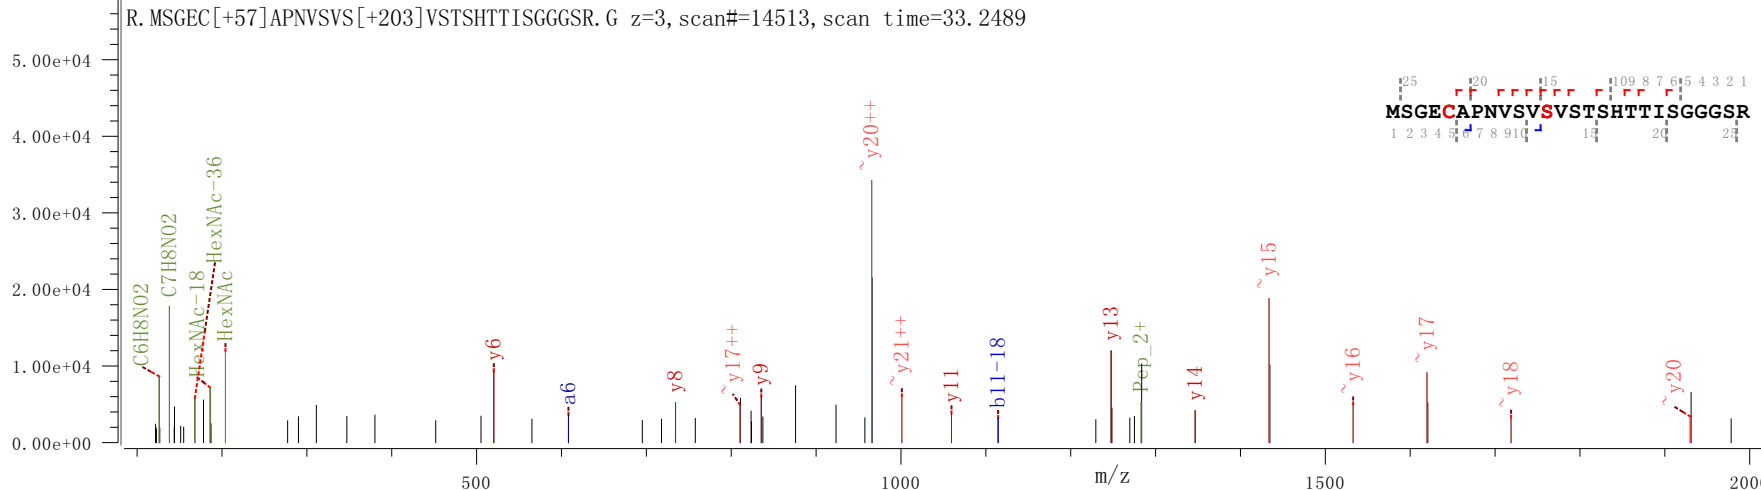

25 20 15 10 9 8 7 6 5 4 3 2 1  
MSGECAPNVSVSVSTSHTTISGGGSR  
1 2 3 4 5 6 7 8 9 10 11 12 13 14 15 16 17 18 19 20 21 22 23 24 25

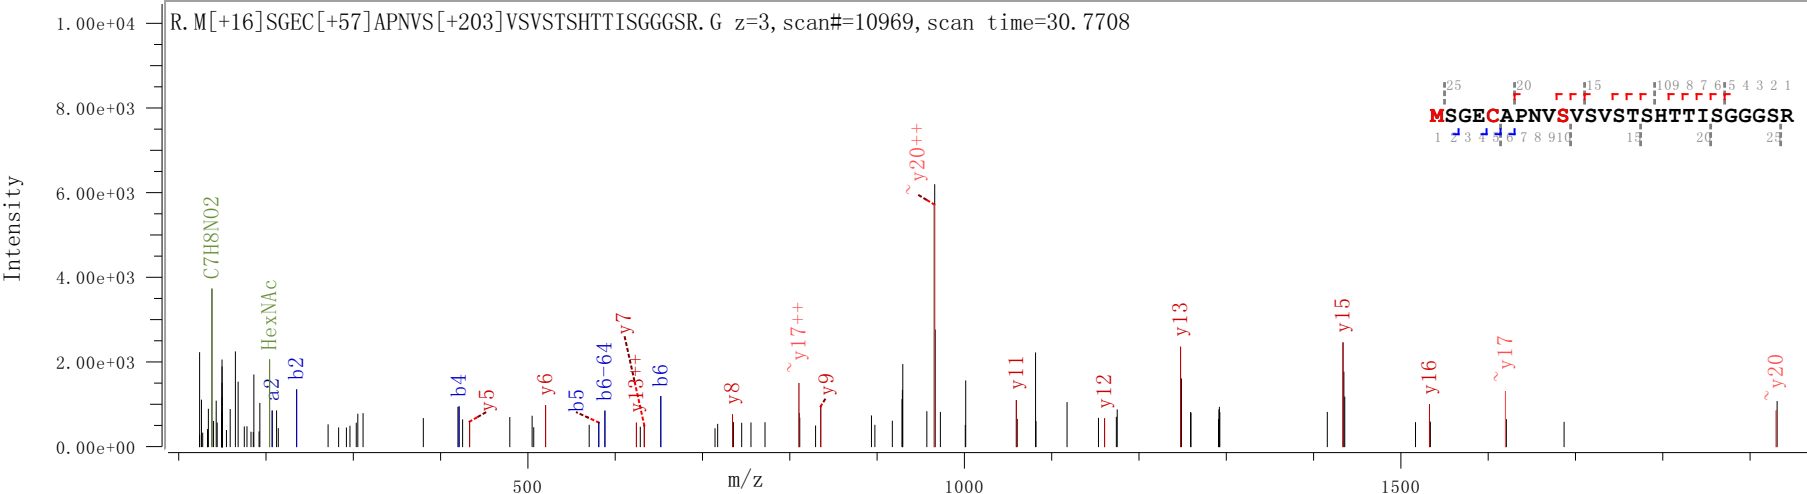

R. VSG LQGSDALNIQQNQ T SGGSLQAGQQK. E z=3, scan#=16227, scan time=38.0553

Intensity

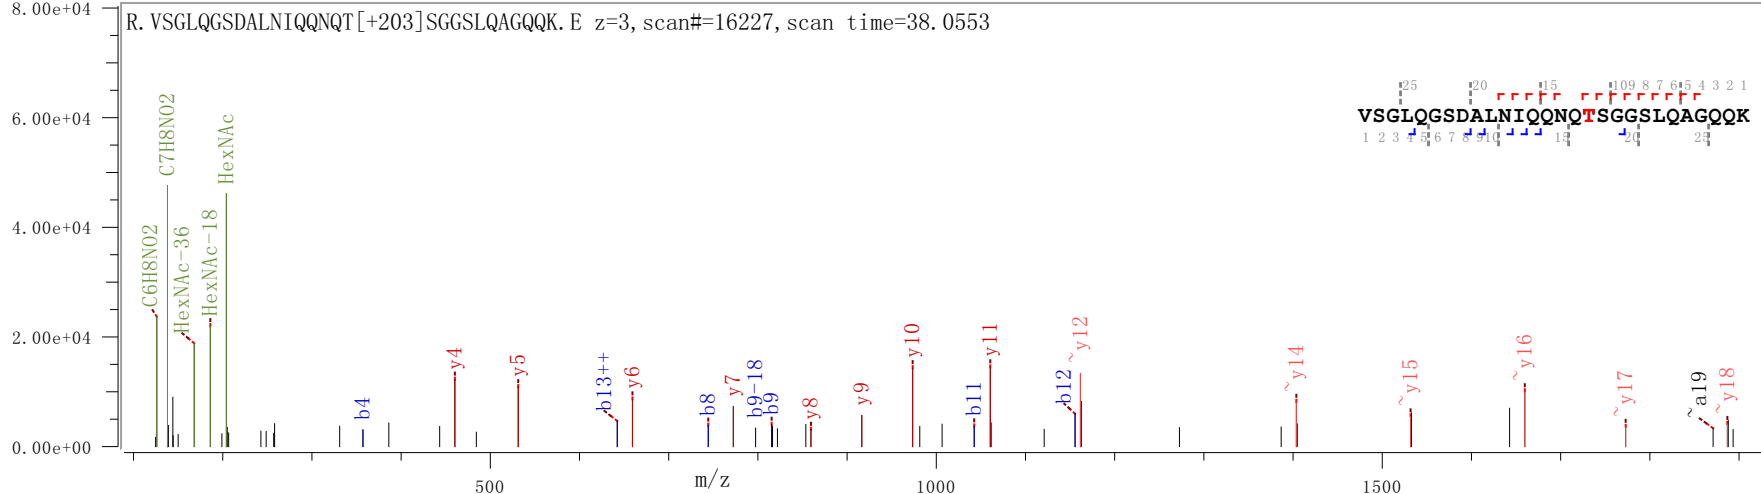

25 20 15 109 8 7 6 5 4 3 2 1  
VSG LQGSDALNIQQNQ T SGGSLQAGQQK  
1 2 3 4 5 6 7 8 9 10 11 12 13 14 15 16 17 18 19 20 21 22 23 24 25



K. IGVS[+203]SDSGSINPMSEGFK. F z=2, scan#=22901, scan time=46.6840

Intensity

2.50e+04  
2.00e+04  
1.50e+04  
1.00e+04  
5.00e+03  
0.00e+00

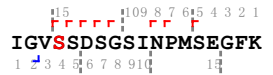

C6H8N02  
C7H8N02

b2  
HexNAc

y5

y7

y8

y11

y12

y13

y14

~y15

Pep\_1+

500

m/z

1000

1500

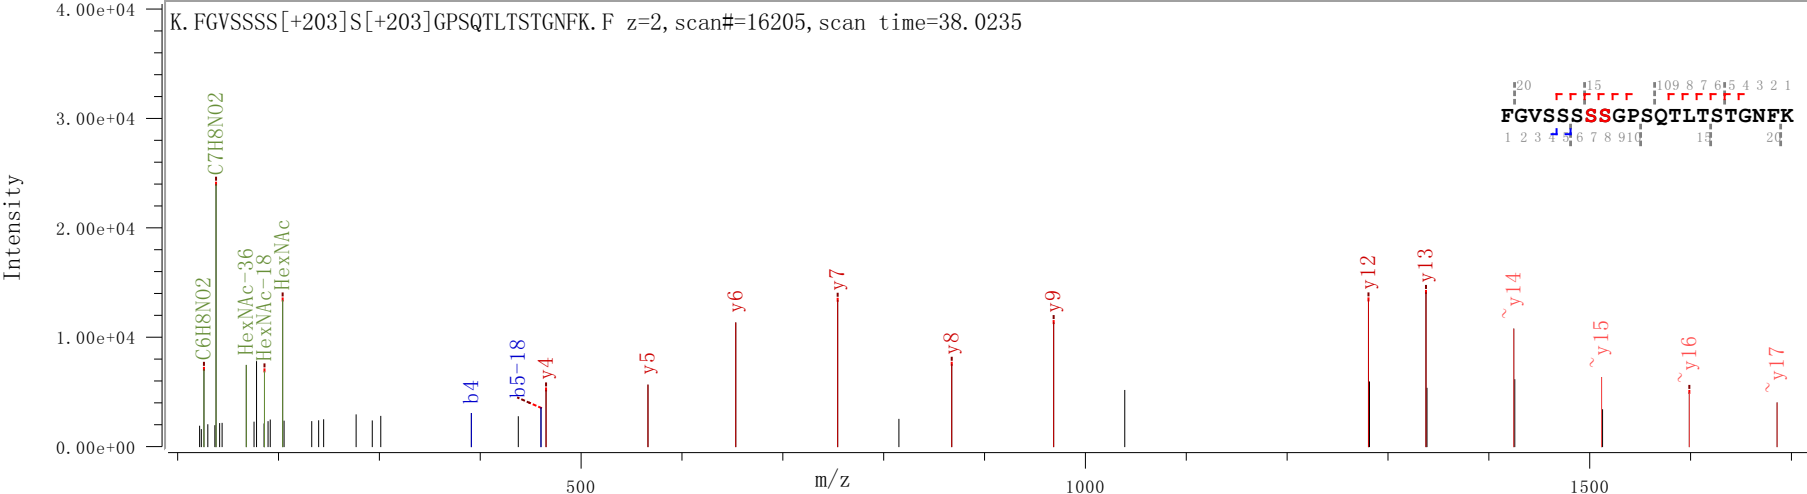

K. FGVSSSSSGPSQTLTS [+203] TGNFK. F z=2, scan#=19036, scan time=40.7820

Intensity

2.50e+04  
2.00e+04  
1.50e+04  
1.00e+04  
5.00e+03  
0.00e+00

20 15 10 9 8 7 6 5 4 3 2 1  
FGVSSSSSGPSQTLTS**S**TGNFK  
1 2 3 4 5 6 7 8 9 10 11 12 13 14 15 16 17 18 19 20

C6H8N02  
C7H8N02  
HexNAc-36  
HexNAc-18  
HexNAc  
b2

y2

b4-18  
b4

y4

y5

~y6

~y7

~y8

~y9

~y12

~y13

~y14

~y15

~y16

a16

m/z

500

1000

1500

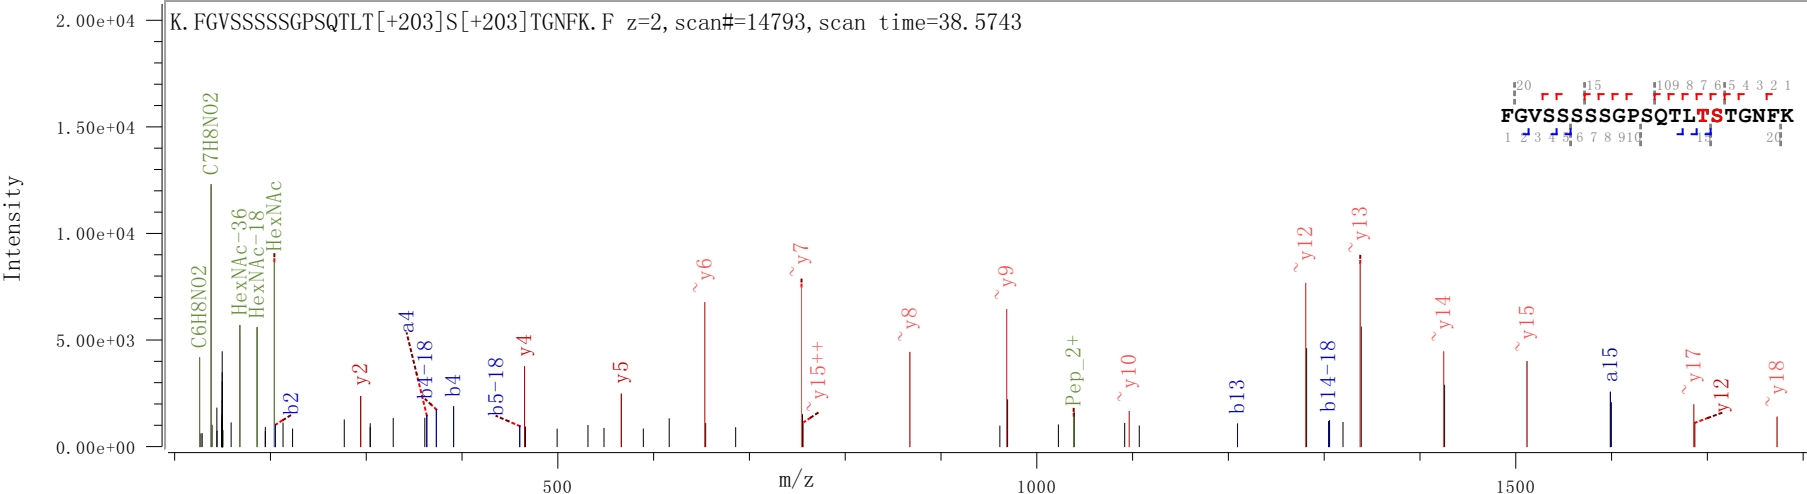

K. STEANVLPPS [+203]S [+203]IGFTFSVPVAK. T z=3, scan#=32318, scan time=67.0242

Intensity

1.50e+05  
1.00e+05  
5.00e+04  
0.00e+00

20 15 109 8 7 6 5 4 3 2 1  
**STEANVLPPSSIGFTFSVPVAK**  
1 2 3 4 5 6 7 8 9 10 11 12 13 14 15 16 17 18 19 20

C6H8N02  
C7H8N02  
HexNAc-36  
HexNAc-18  
HexNAc

y2

b3-18  
b3

y4

b5-18  
b5

b6-18  
b6

b7

y7

~ y15++

y8

y10

y20++  
~ y12

~ y13

~ y14

~ y15

~ y16

m/z

200

400

600

800

1000

1200

1400

1600

K. FGVSSSS [+203]SGPSQTLTSTGNFK. F z=3, scan#=19094, scan time=40.8715

Intensity

1.50e+05  
1.00e+05  
5.00e+04  
0.00e+00

20 15 10 9 8 7 6 5 4 3 2 1  
FGVSSSSSGPSQTLTSTGNFK  
1 2 3 4 5 6 7 8 9 10 11 12 13 14 15 16 17 18 19 20

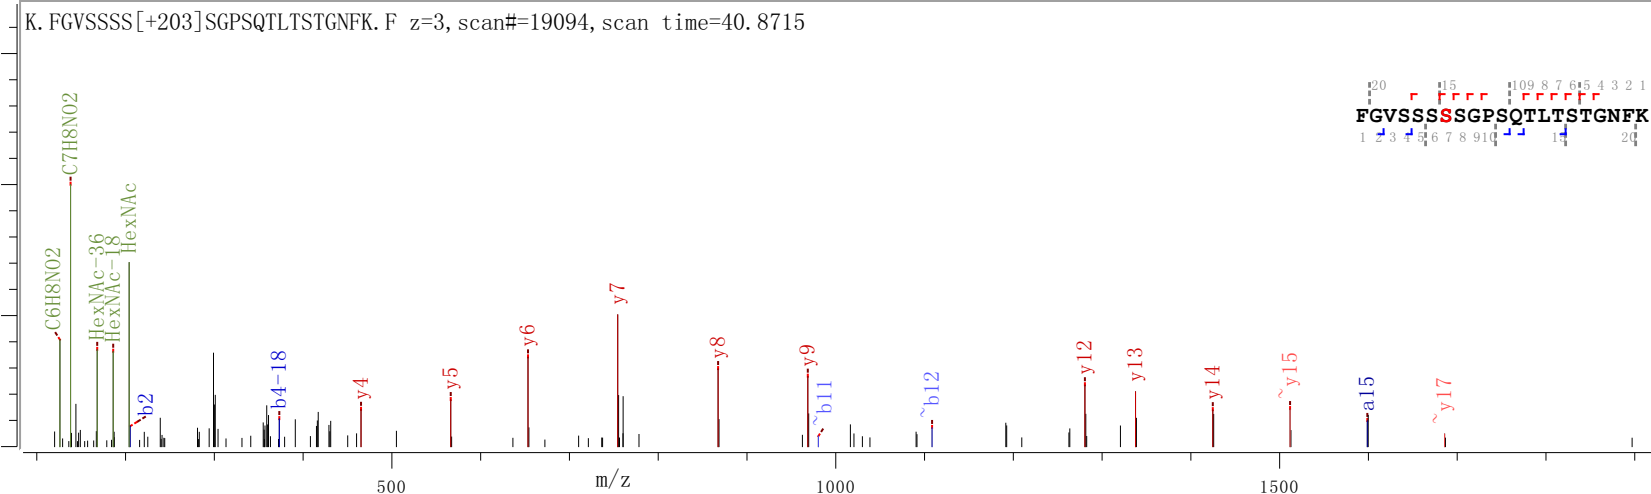

500

m/z

1000

1500

K. QQEPVT[+203]STSLVFGK. K z=2, scan#=20069, scan time=42.3206

Intensity

8.00e+04  
6.00e+04  
4.00e+04  
2.00e+04  
0.00e+00

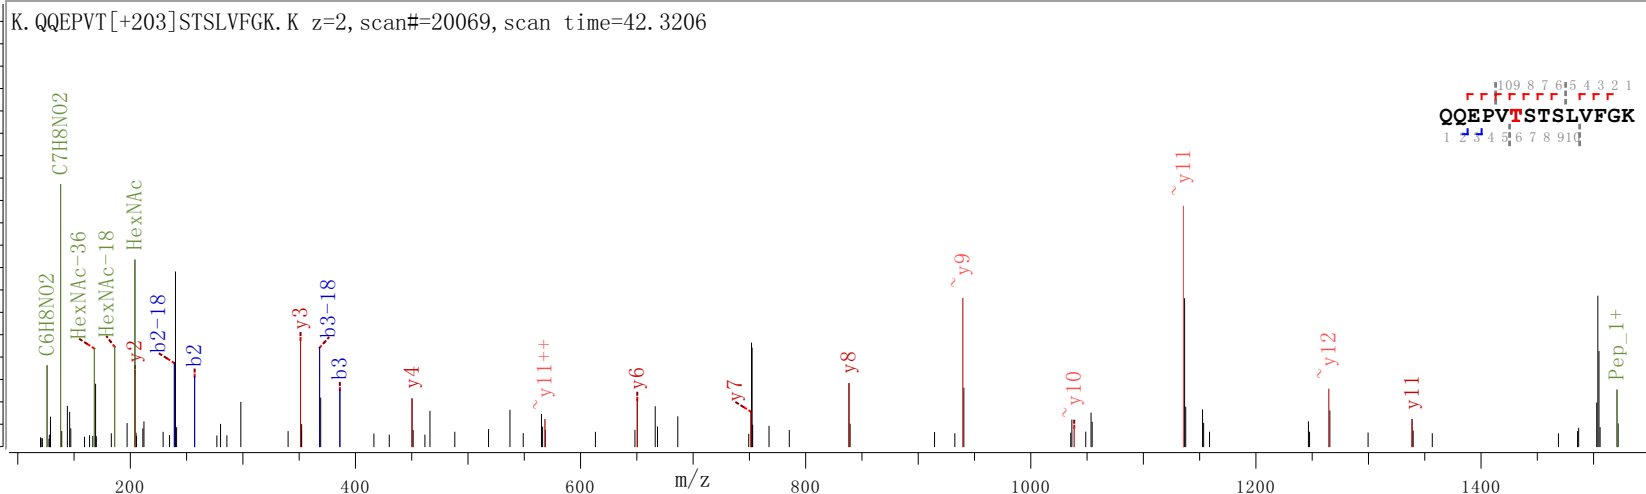

109 8 7 6 5 4 3 2 1  
QQEPVTSTSLVFGK  
1 2 3 4 5 6 7 8 9 10

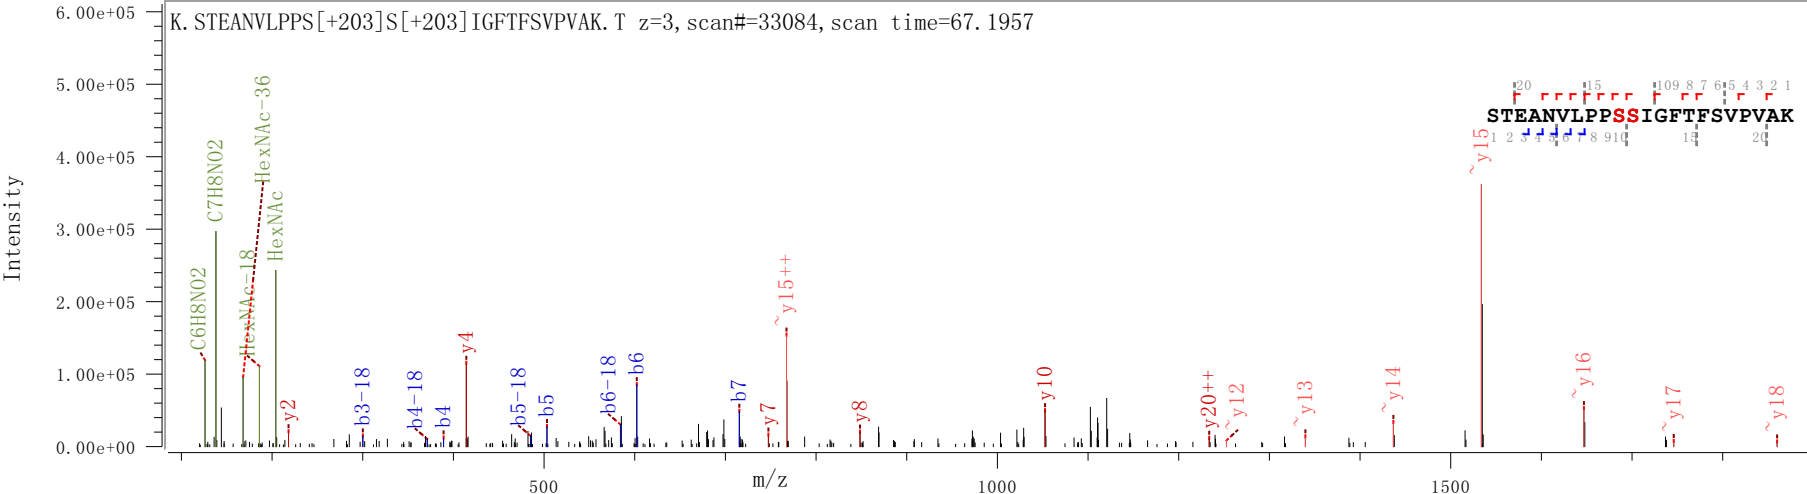



K. SSSAGFSFGTGVINST[+203]PAPAN[T+203]IVTSENK. S z=3, scan#=28450, scan time=57.4088

Intensity

2.00e+05  
1.50e+05  
1.00e+05  
5.00e+04  
0.00e+00

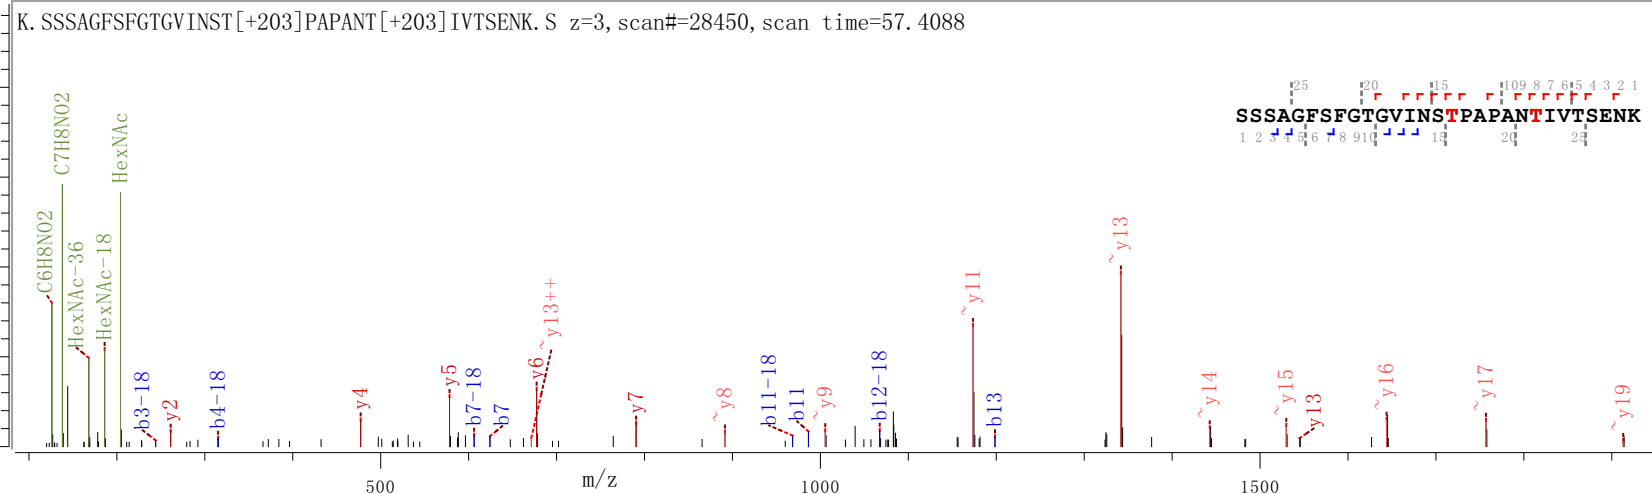

25 20 15 10 9 8 7 6 5 4 3 2 1  
SSSAGFSFGTGVINSTPAPAN[T+203]IVTSENK  
1 2 3 4 5 6 7 8 9 10 11 12 13 14 15 16 17 18 19 20 21 22 23 24 25

K. STEANVLPPS [+203]S [+203]IGFTFSVPVAK. T z=3, scan#=36538, scan time=67.3227

Intensity

5.00e+05  
4.00e+05  
3.00e+05  
2.00e+05  
1.00e+05  
0.00e+00

20 15 109 8 7 6 5 4 3 2 1  
STEANVLPPSSIGFTFSVPVAK  
1 2 3 4 5 6 7 8 9 10 11 12 13 14 15 16 17 18 19 20

C6H8N02  
C7H8N02  
HexNAc-36  
HexNAc-18

HexNAc

y2

b3-18  
b3

b4

y4

b5

b6-18  
b6

b7-18  
b7

y8

y10

y12

y13

y14

y15

y16

y17

y15++

500

m/z

1000

1500

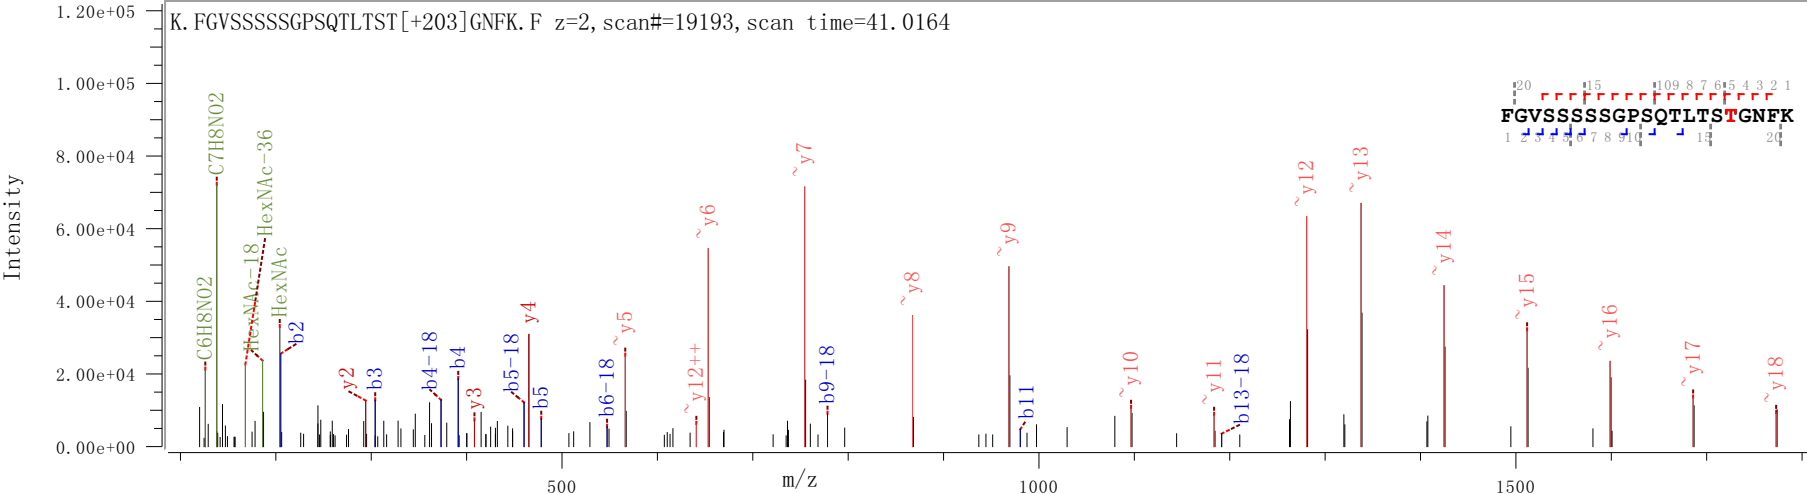

K. SSSAGFSFGTGVINST[+203]PAPANTIVTSENK. S z=3, scan#=32020, scan time=60.8028

Intensity

4.00e+05  
3.00e+05  
2.00e+05  
1.00e+05  
0.00e+00

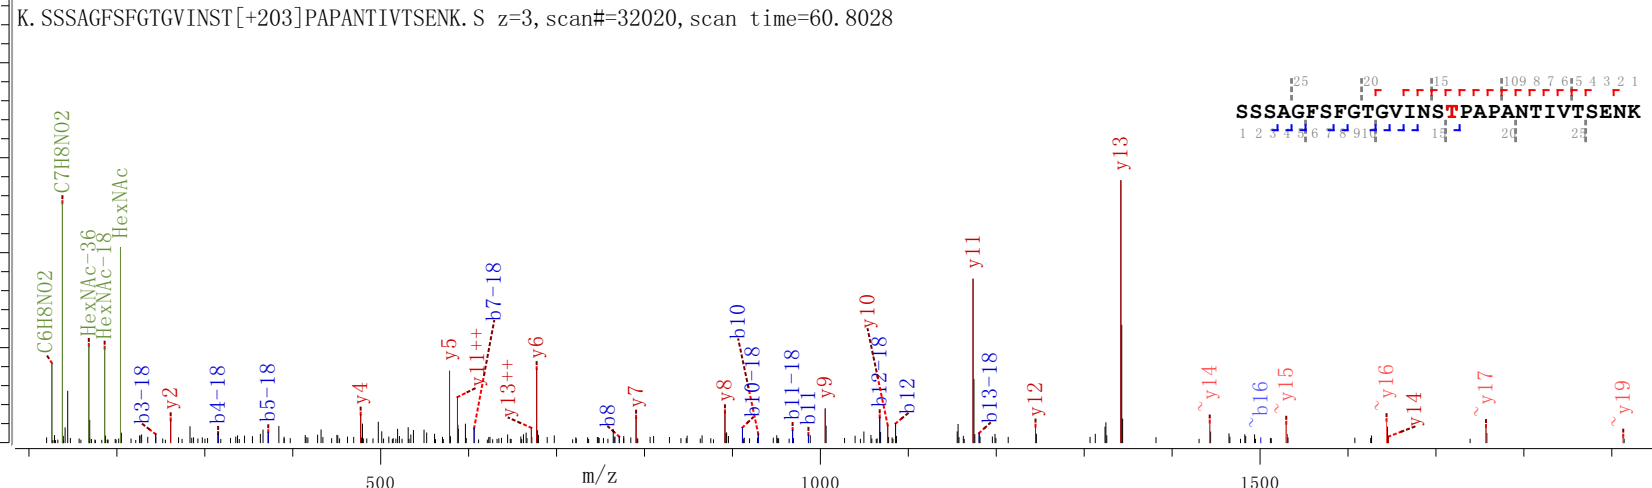

25 20 15 109 8 7 6 5 4 3 2 1  
SSSAGFSFGTGVINSTPAPANTIVTSENK  
1 2 3 4 5 6 7 8 9 10 11 12 13 14 15 16 17 18 19 20 21 22 23 24 25

m/z

1000

1500

K. SGTVTVAQQAQVVT [+203] T [+203] VVGGVTK. T z=3, scan#=18529, scan time=39.9529

Intensity

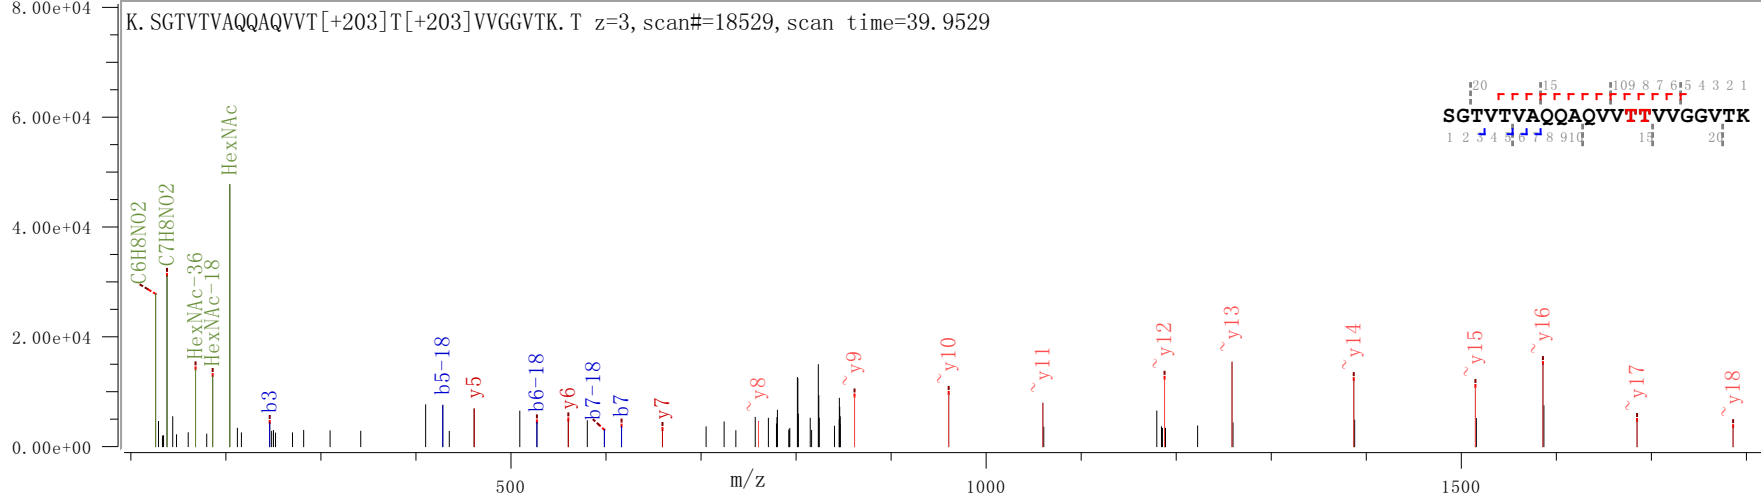

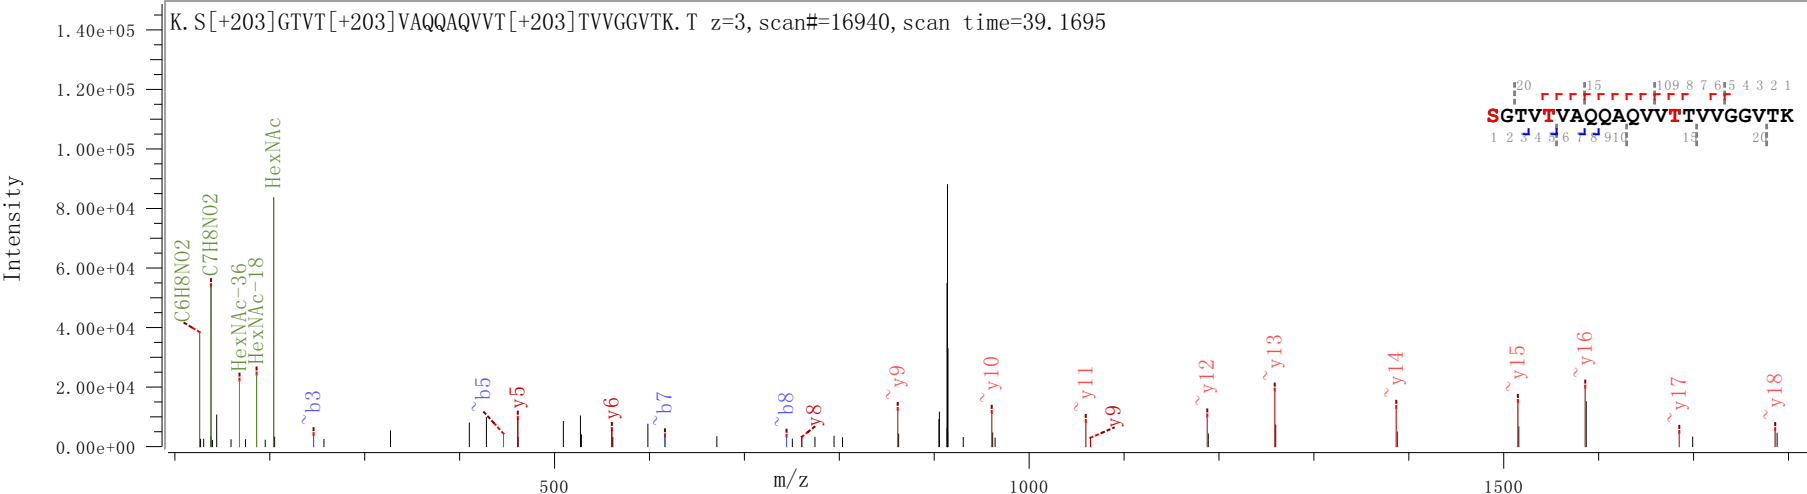

K. GVSVSSSTTGLPDMT[+203]GSVYNK. T z=2, scan#=19616, scan time=46.1091

Intensity

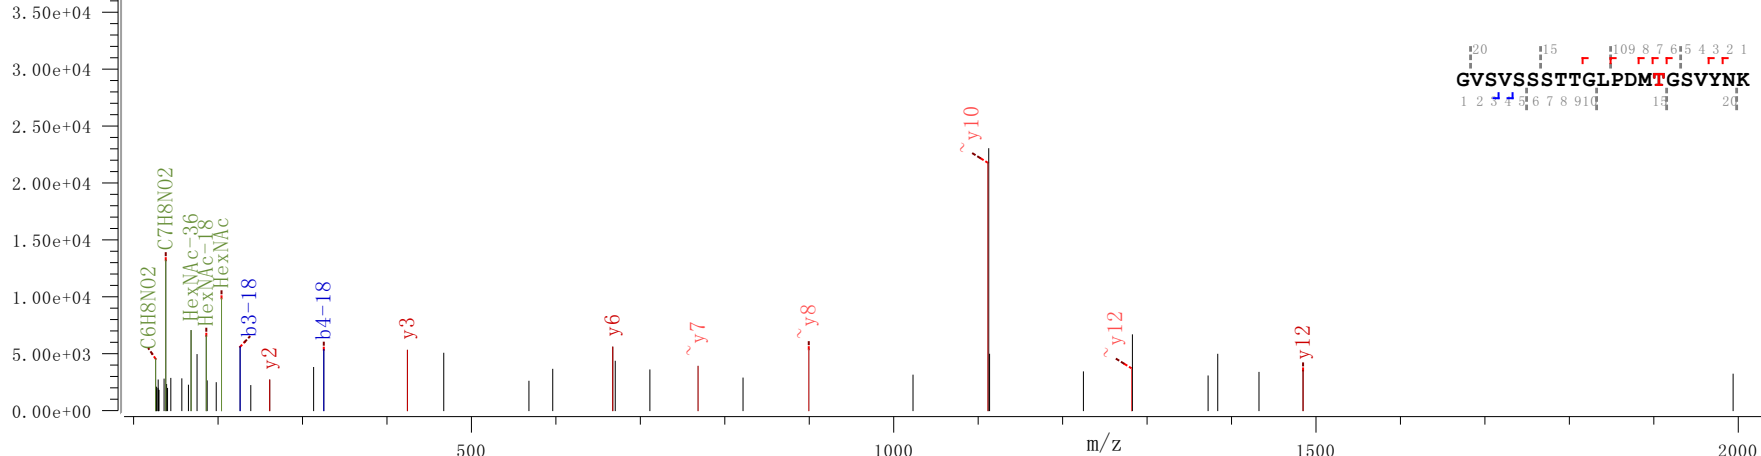

K. GVSVSSSTTGLPDMT[+203]GSVYNK. T z=3, scan#=22567, scan time=46.1806

Intensity

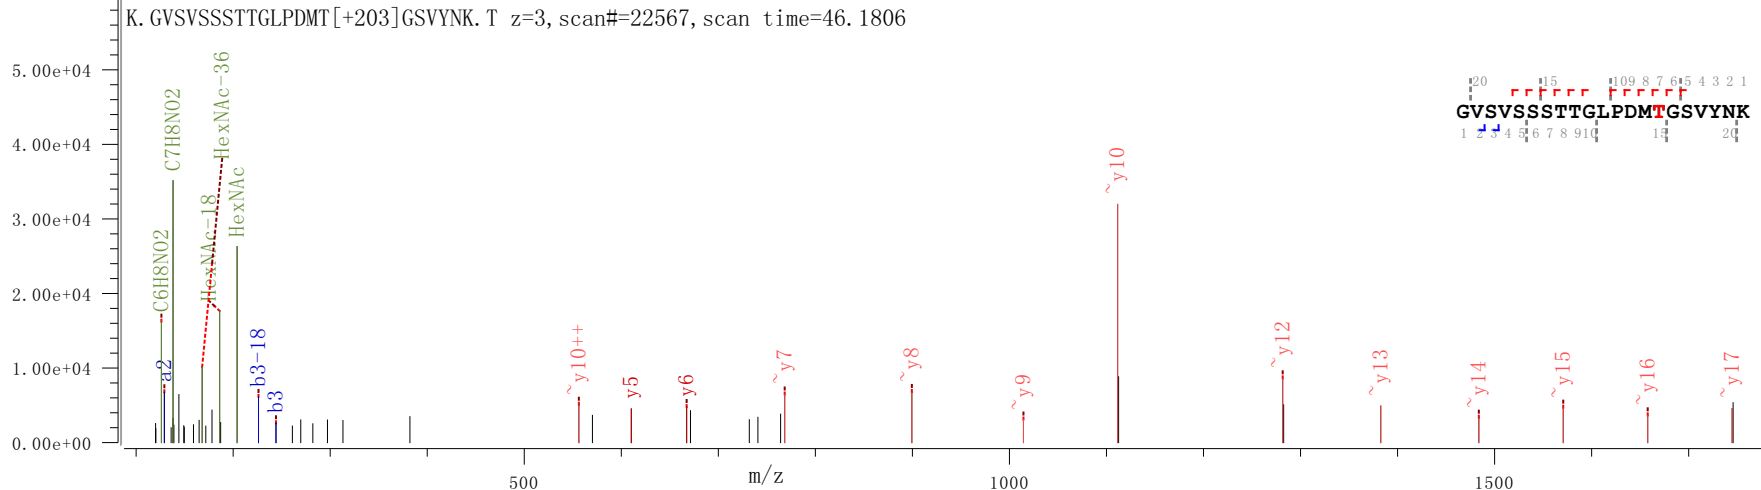

20 15 10 9 8 7 6 5 4 3 2 1  
GVSVSSSTTGLPDMTGSVYNK  
1 2 3 4 5 6 7 8 9 10 11 12 13 14 15 16 17 18 19 20



K. LLQLPSTTIENIS[+203]VS[+203]VHQPPK. H z=3, scan#=25310, scan time=55.1335

Intensity

8.00e+04  
6.00e+04  
4.00e+04  
2.00e+04  
0.00e+00

20 15 10 9 8 7 6 5 4 3 2 1  
LLQLPSTTIENISVS~~V~~HQPQPK  
1 2 3 4 5 6 7 8 9 10 11 12 13 14 15 16 17 18 19 20

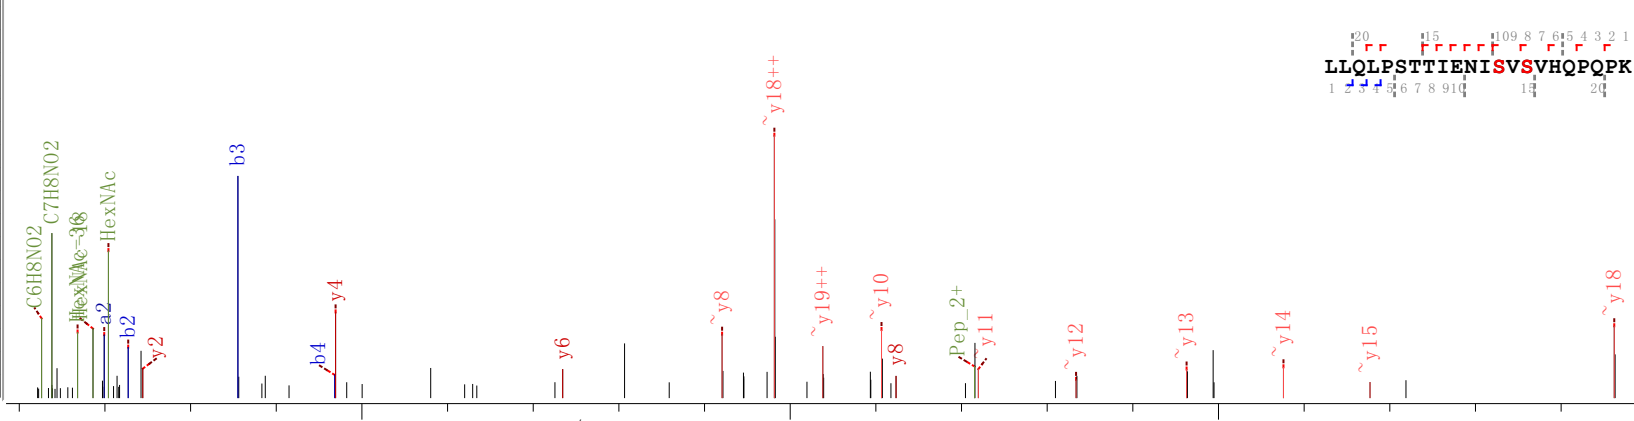

m/z

1500

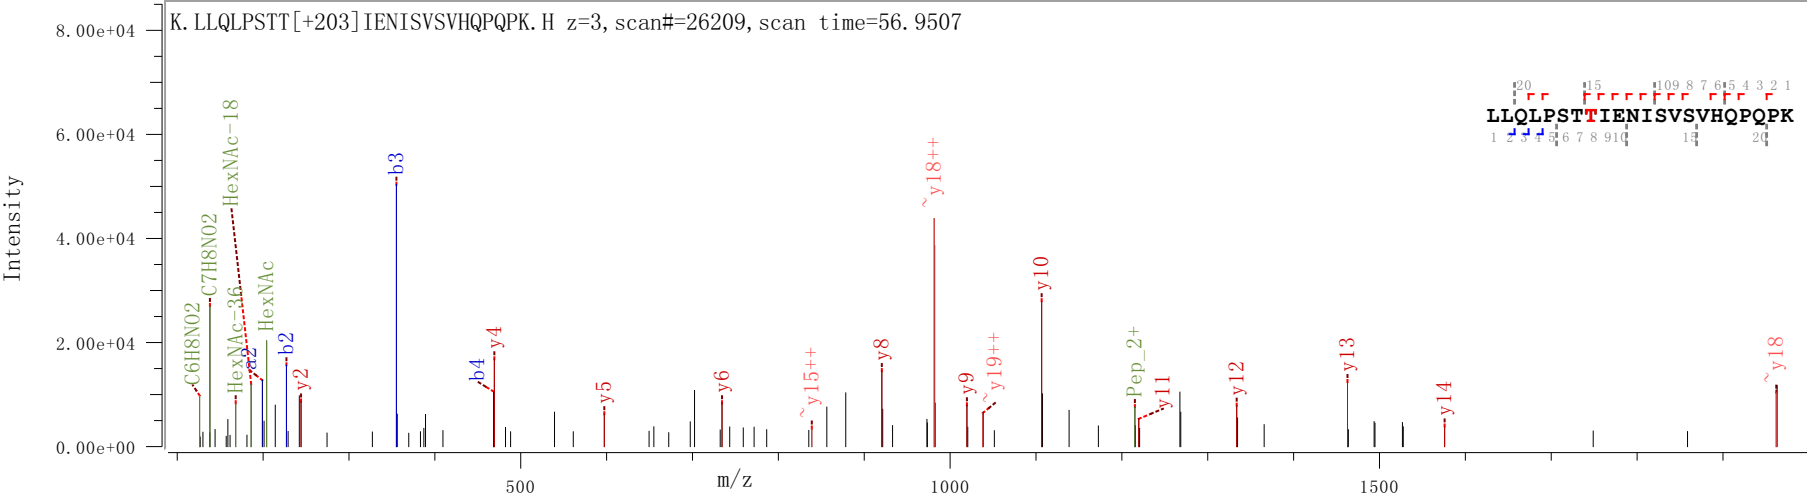

K. LLQLPSTT[+203]IENIS[+203]VS[+203]VHQPPK. H z=3, scan#=25659, scan time=52.8113

Intensity

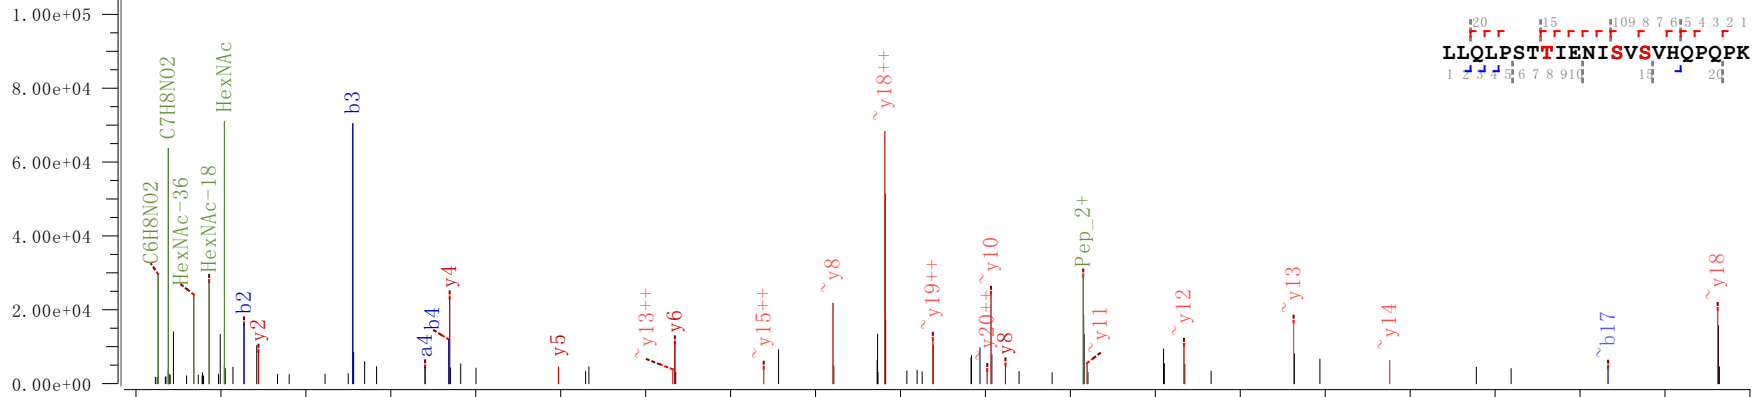

20 15 10 9 8 7 6 5 4 3 2 1  
LLQLPSTT**I**ENIS**S**V**S**VHQPPK  
1 2 3 4 5 6 7 8 9 10 11 12 13 14 15 16 17 18 19 20

K. LLQLPSTTIENIS[+203]VS[+203]VHQPPK. H z=3, scan#=26900, scan time=54.6789

Intensity

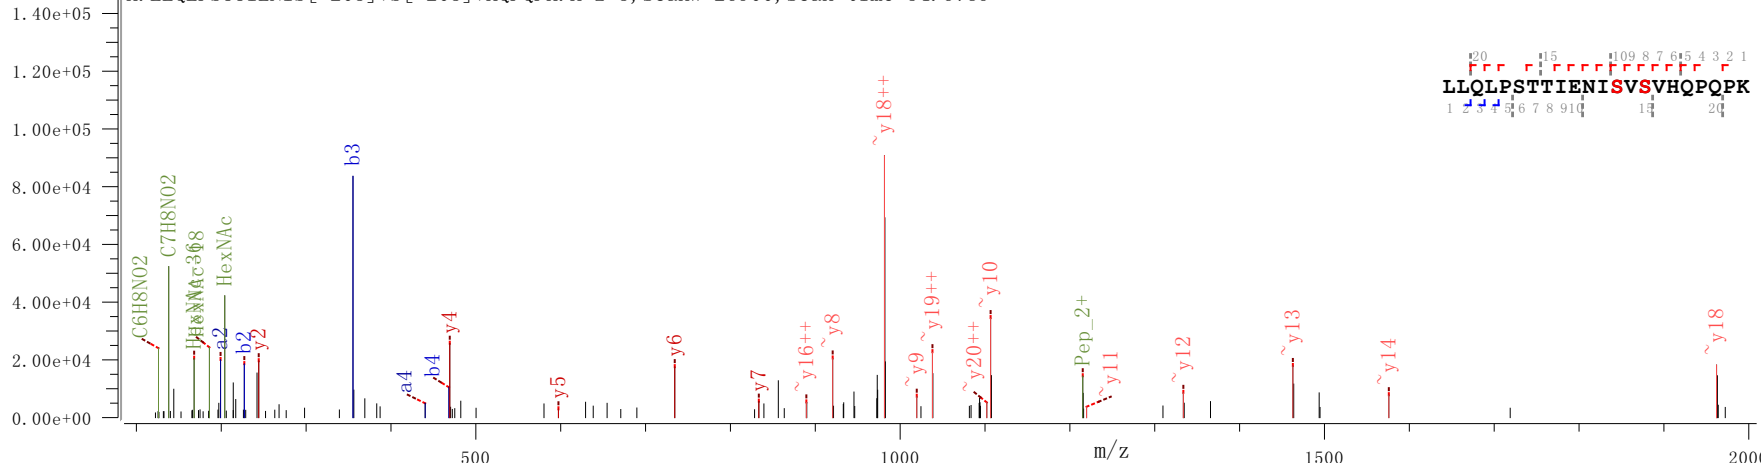

20 15 109 8 7 6 5 4 3 2 1  
LLQLPSTTIENISVS~~V~~HQPQPK  
1 2 3 4 5 6 7 8 9 10 11 12 13 14 15 16 17 18 19 20

K. LLQLPSTTIENISVS[+203]VHQPPK. H z=3, scan#=29537, scan time=59.0035

Intensity

1.50e+05  
1.00e+05  
5.00e+04  
0.00e+00

20 15 10 9 8 7 6 5 4 3 2 1  
LLQLPSTTIENISVSVHQPPK  
1 2 3 4 5 6 7 8 9 10 11 12 13 14 15 16 17 18 19 20

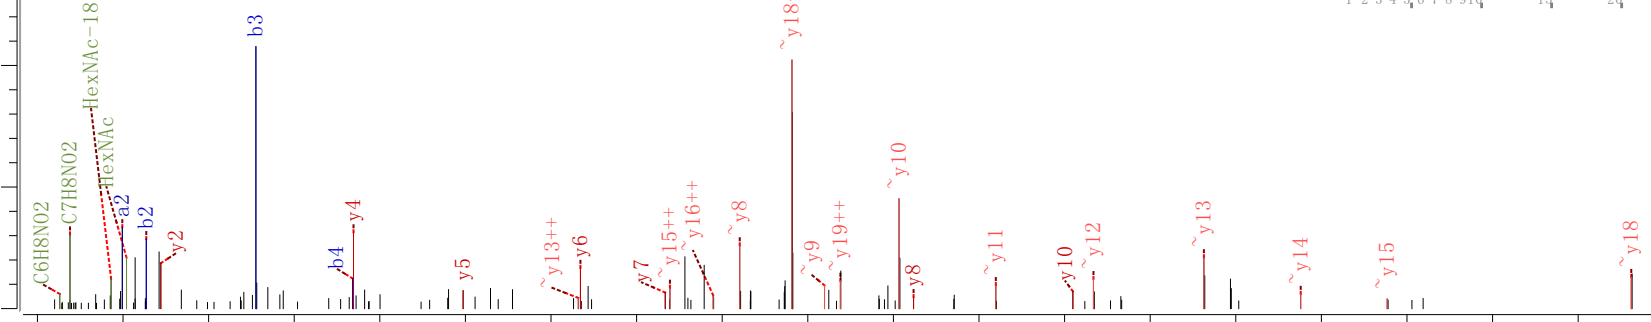

500

m/z

1000

1500

K. SGTTSSESGALSLEPS[+203]HIGDLQK. A z=3, scan#=17860, scan time=43.4292

Intensity

7.00e+04  
6.00e+04  
5.00e+04  
4.00e+04  
3.00e+04  
2.00e+04  
1.00e+04  
0.00e+00

20 15 109 8 7 6 5 4 3 2 1  
SGTTSSESGALSLEPSHIGDLQK  
1 2 3 4 5 6 7 8 9 10 11 12 13 14 15 16 17 18 19 20

C6H8N02  
C7H8N02

HexNAc-36  
HexNAc-18

HexNAc

b4-18

y3

b5-18

b6-18

y5

b9-18

b9

Pep+HexNAc\_3+

y7

y16++

y18++

y9

Pep\_2+

y10

b13-18

y11

y12

y13

y14

y15

y16

m/z

200

400

600

800

1000

1200

1400

1600

K. VM[+16]EVTFQGEYPATLVS[+203]QGAEIIPSGTEHPVFPK. A z=3, scan#=34275, scan time=66.0959

Intensity

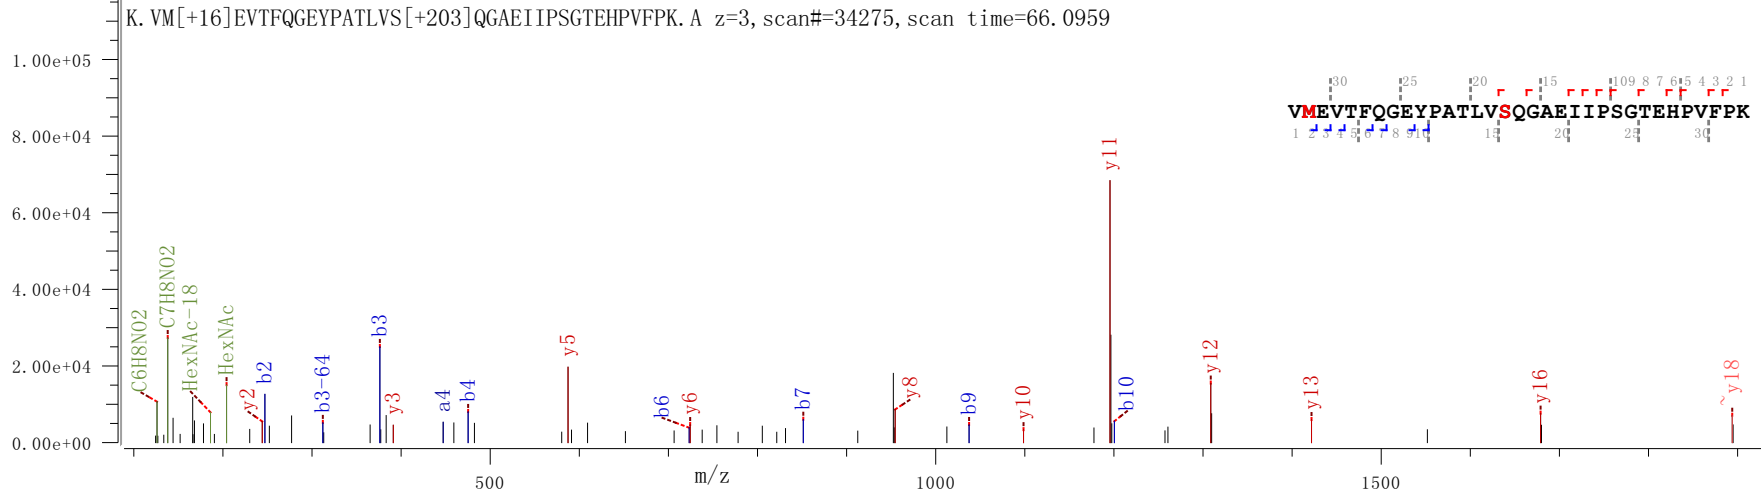

K. VMEVTFQGEYPATLVS [+203] QGAEIIPSGTEHPVFPK. A z=3, scan#=35184, scan time=67.3843

Intensity

1.50e+05  
1.00e+05  
5.00e+04  
0.00e+00

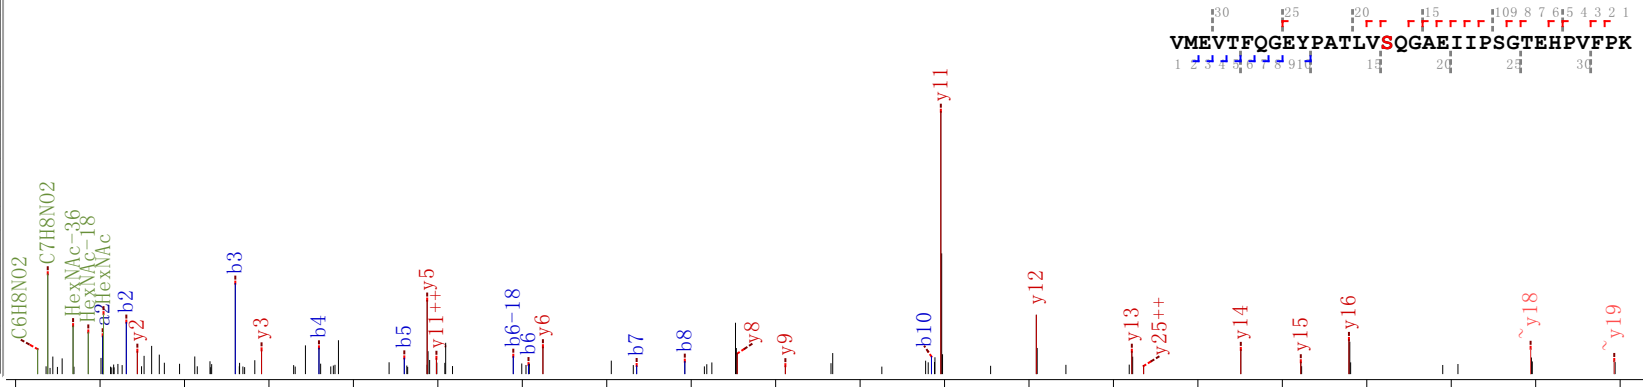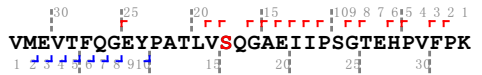



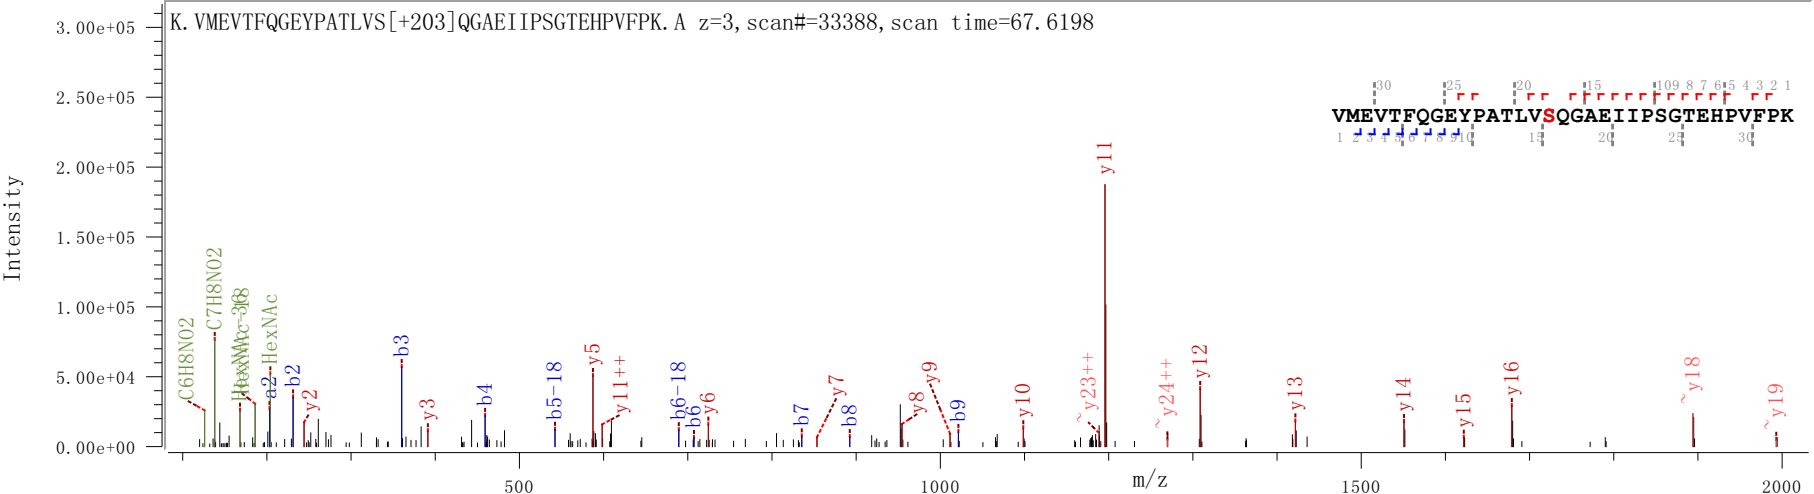

K. SGTTS[+203]GALSLEPSHIGDLQK. A z=3, scan#=19273, scan time=42.8390

Intensity

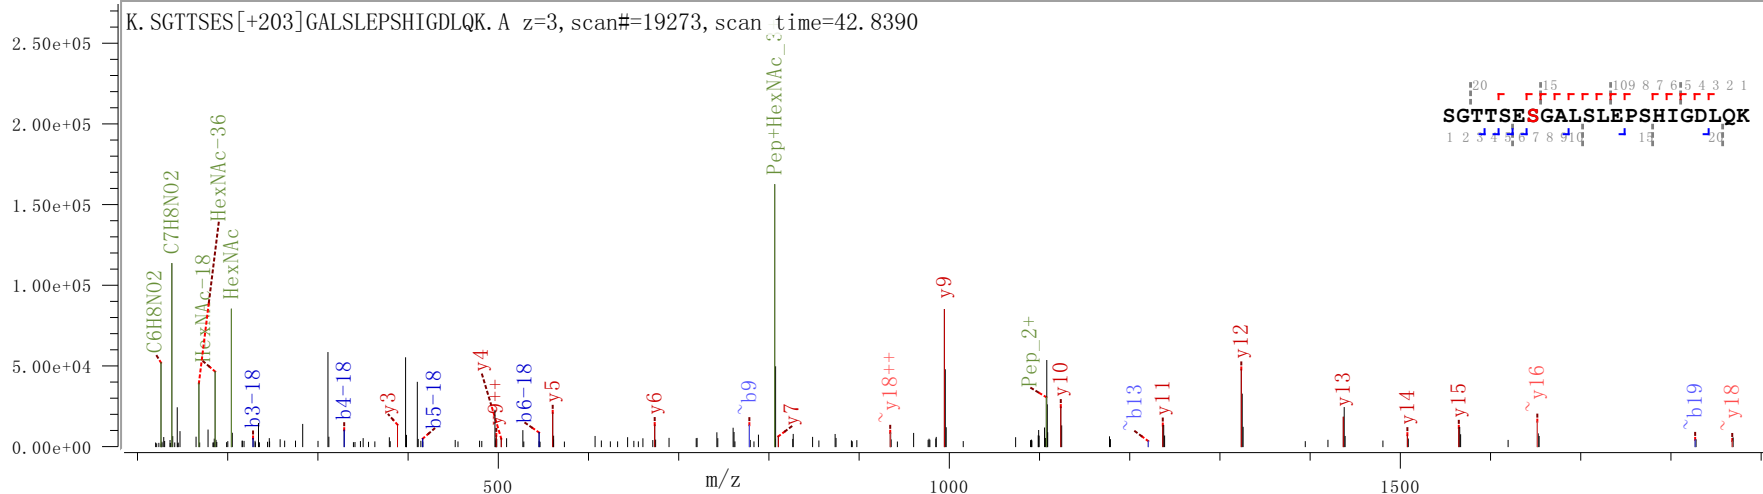

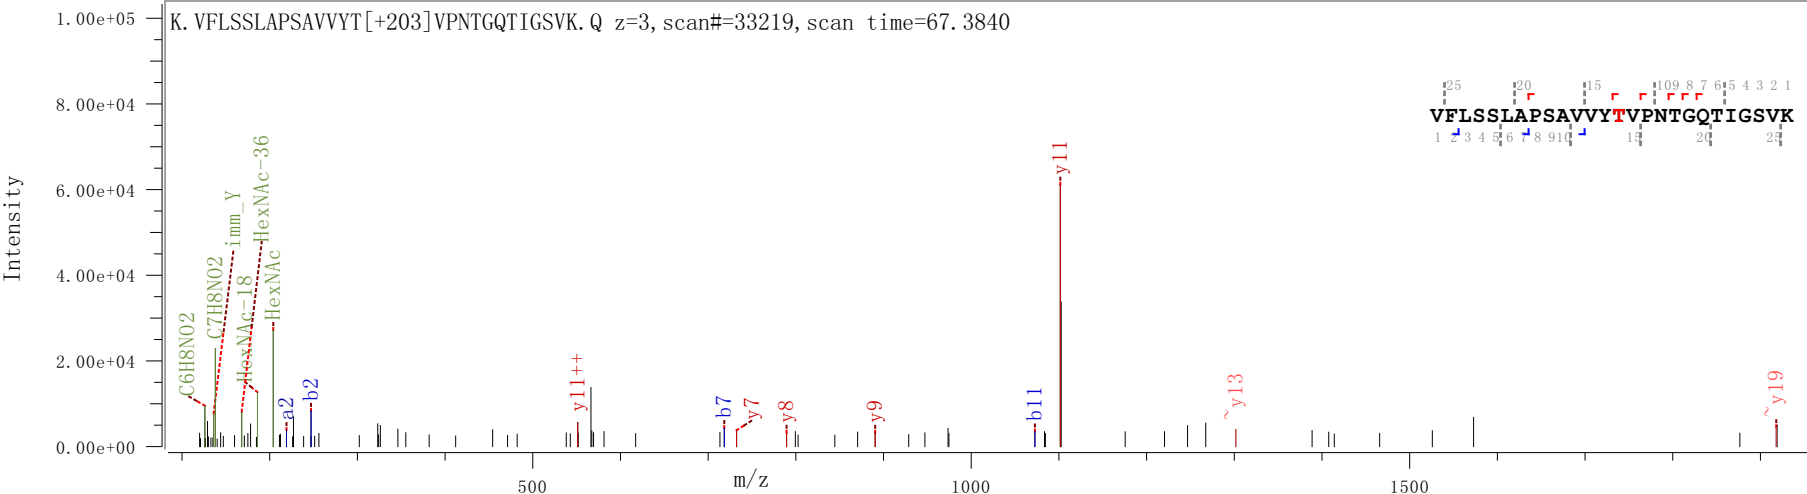

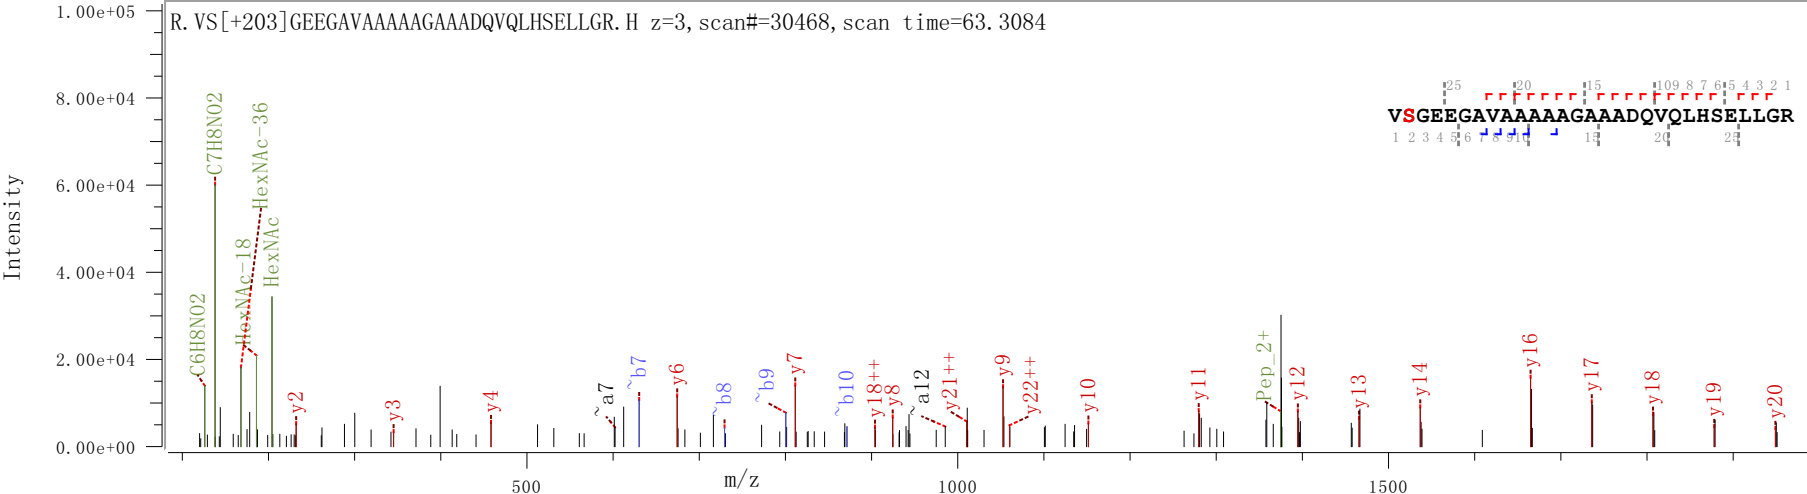

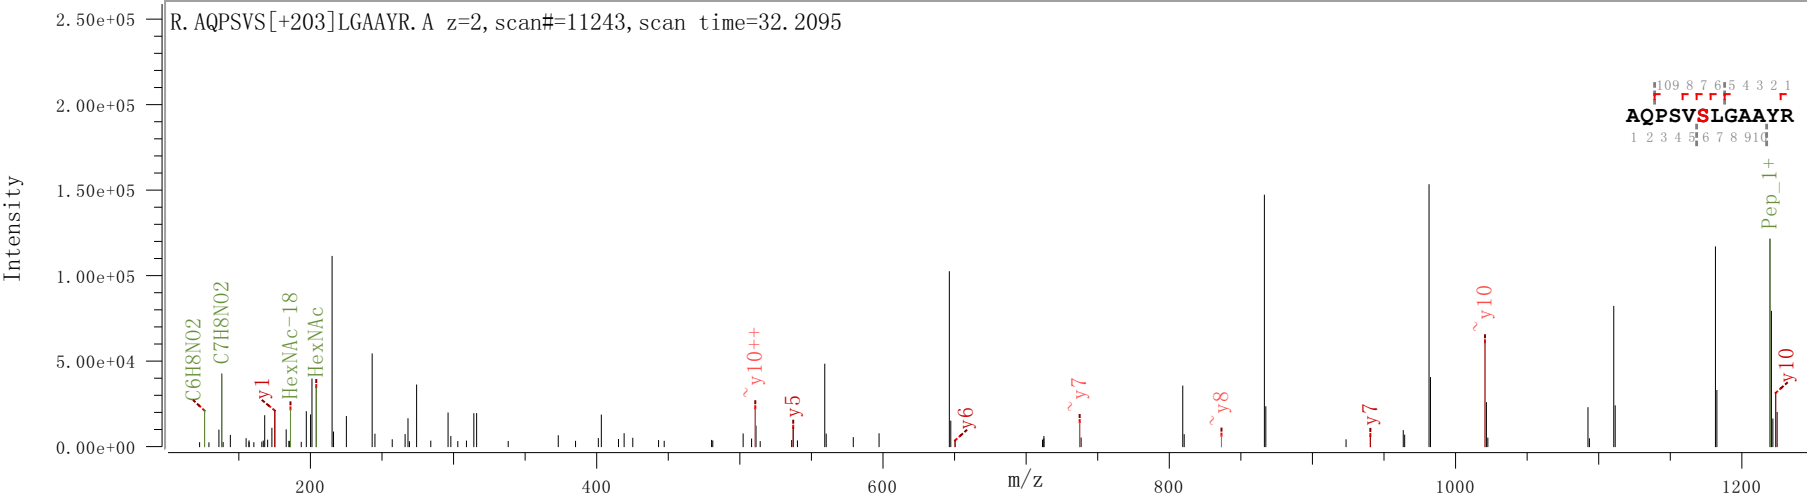

K. STNVIVDSGGFDELGGLLKPT[+203]VASQNQLPVAK. L z=3, scan#=33317, scan time=67.5212

Intensity

4.00e+04  
3.00e+04  
2.00e+04  
1.00e+04  
0.00e+00

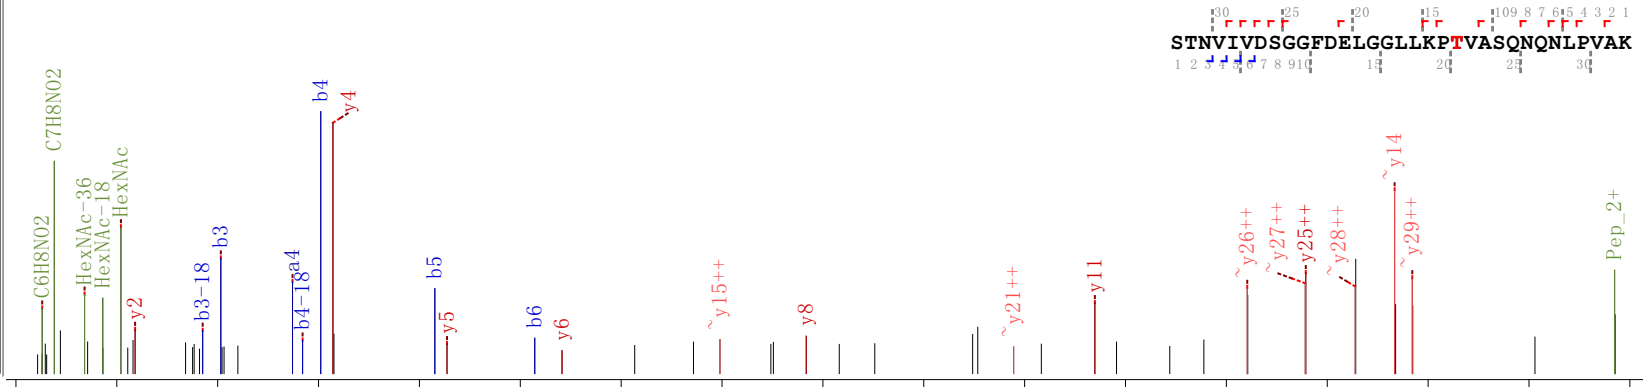

30 25 20 15 109 8 7 6 5 4 3 2 1  
STNVIVDSGGFDELGGLLKPTVASQNQLPVAK  
1 2 3 4 5 6 7 8 9 10 11 12 13 14 15 16 17 18 19 20 21 22 23 24 25 26 27 28 29 30

m/z

500

1000

1500

K. IFTASNVSSVPLPAENVITIT[+203]AGQR. I z=3, scan#=30172, scan time=59.9386

Intensity

1.40e+05  
1.20e+05  
1.00e+05  
8.00e+04  
6.00e+04  
4.00e+04  
2.00e+04  
0.00e+00

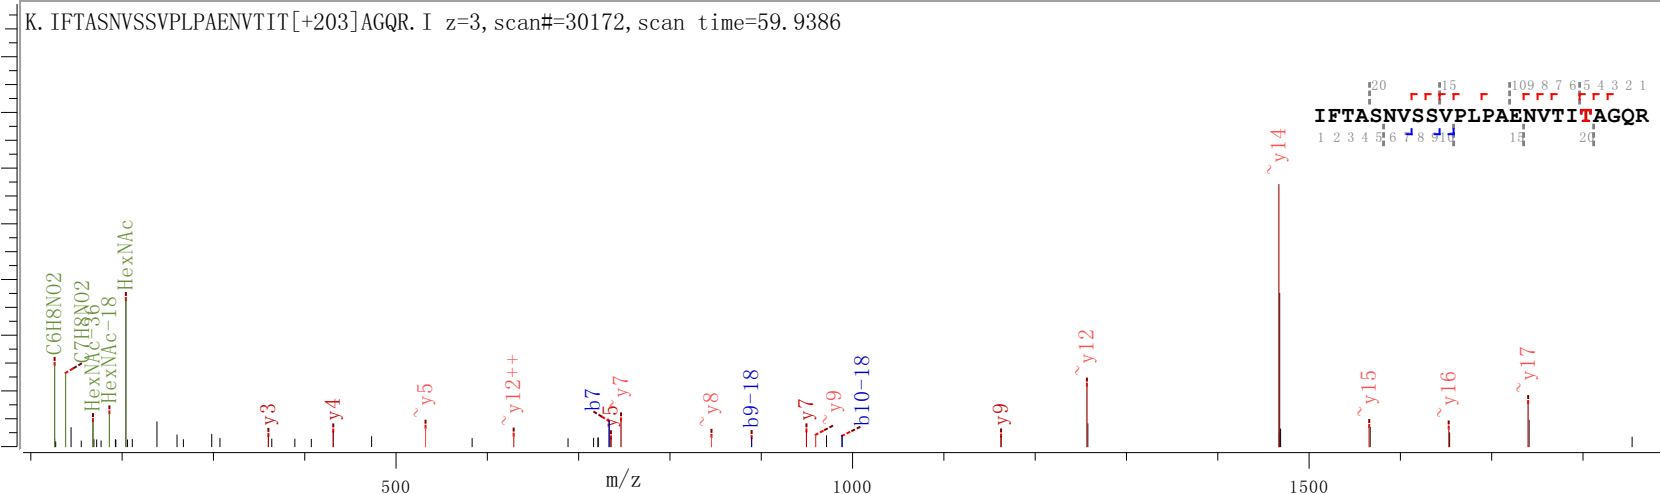

IFTASNVSSVPLPAENVITITAGQR  
1 2 3 4 5 6 7 8 9 10 11 12 13 14 15 16 17 18 19 20

K. TSVPS[+203]S[+203]K. S z=2, scan#=1128, scan time=6.0239

Intensity

1.50e+05  
1.00e+05  
5.00e+04  
0.00e+00

7 6 5 4 3 2 1  
TSVPS SK  
1 2 3 4 5 6 7

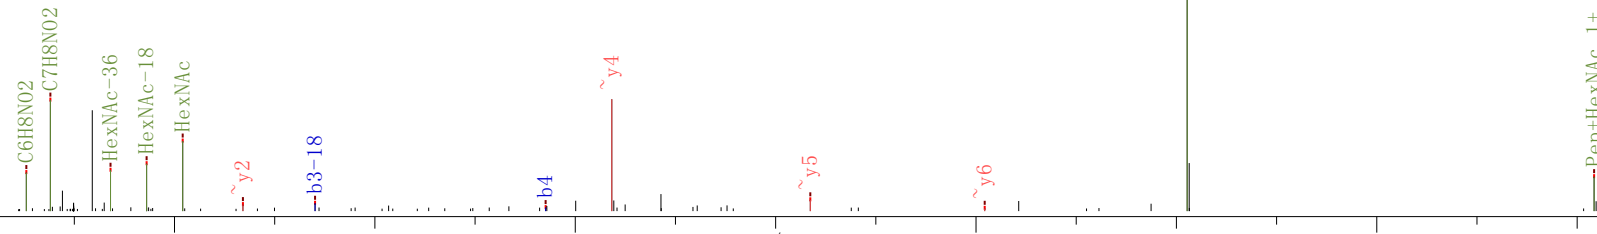



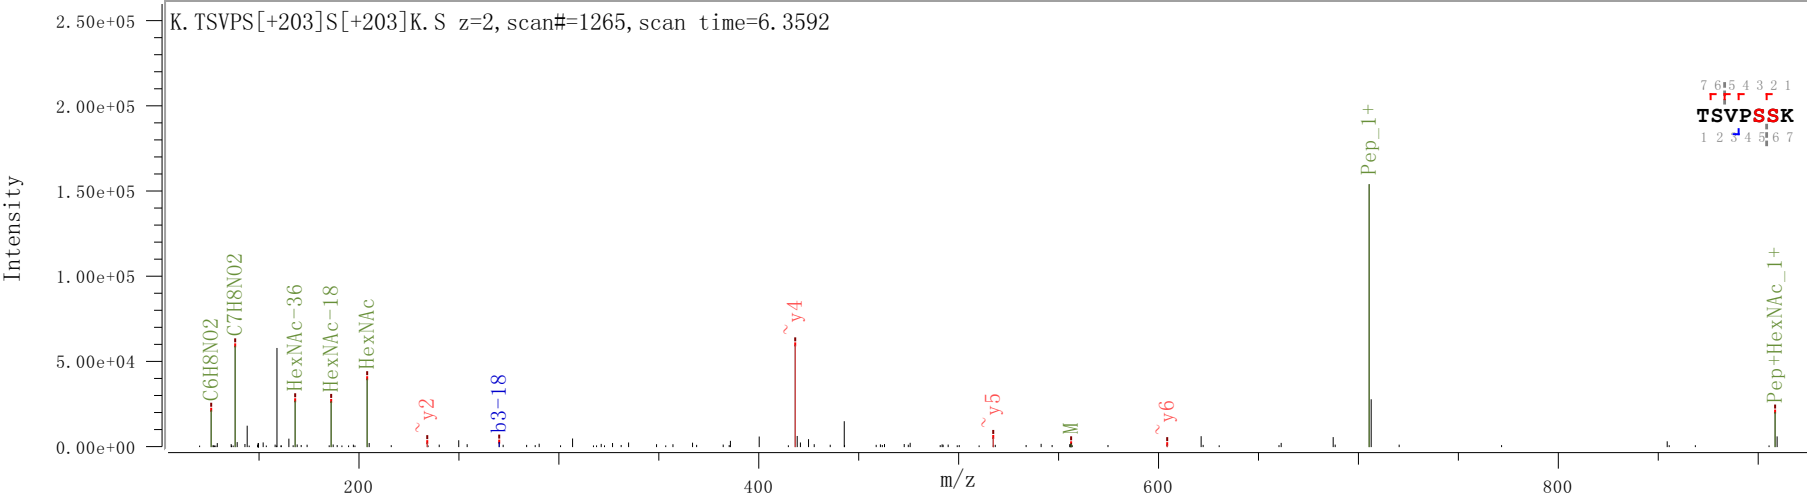

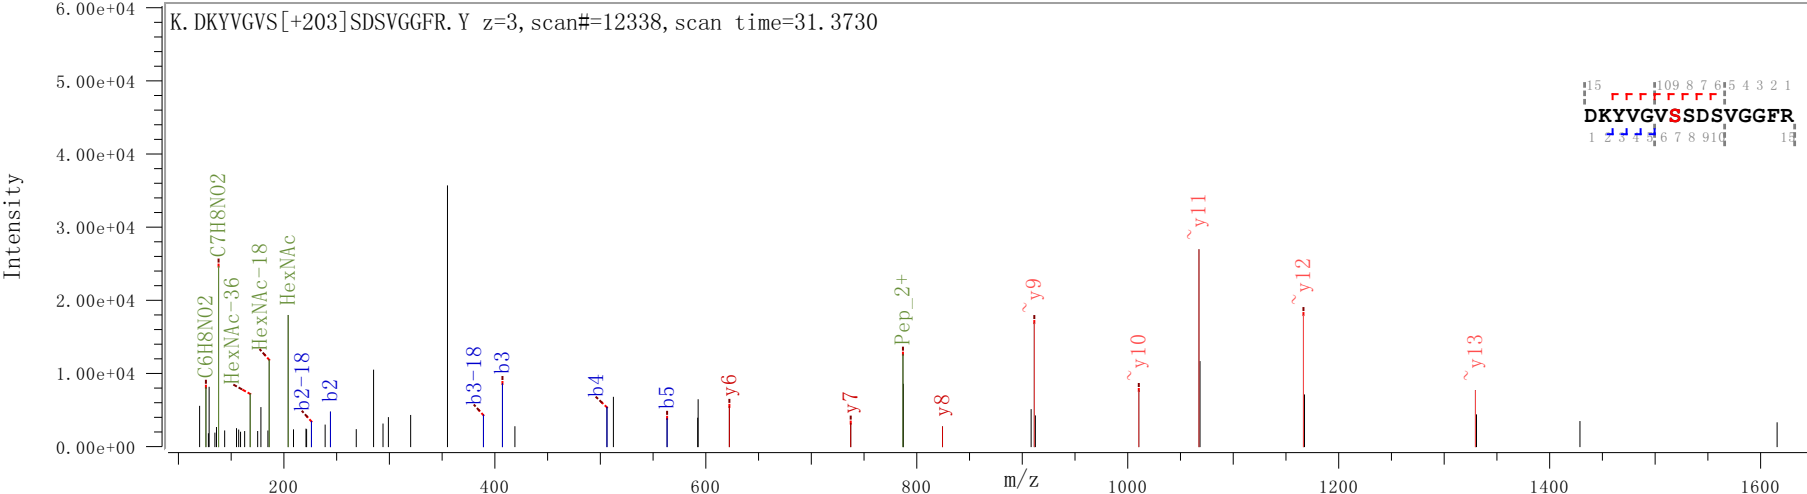

K. YVGV[S+203]SDSVGGFR. Y z=2, scan#=14245, scan time=34.7280

Intensity

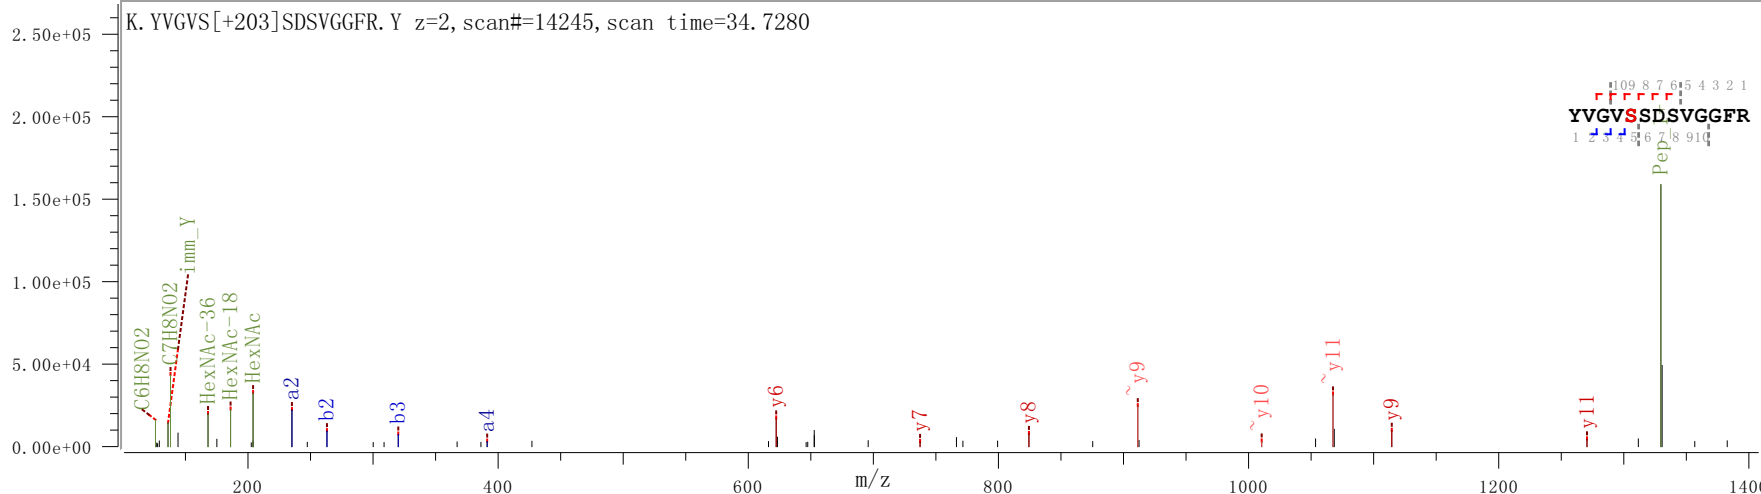

K. GEFKDEEETVT[+203]TK. H z=2, scan#=4367, scan time=16.6519

Intensity

1.50e+04  
1.00e+04  
5.00e+03  
0.00e+00

109 8 7 6 5 4 3 2 1  
GEFKDEEETVTK  
1 2 3 4 5 6 7 8 9 10

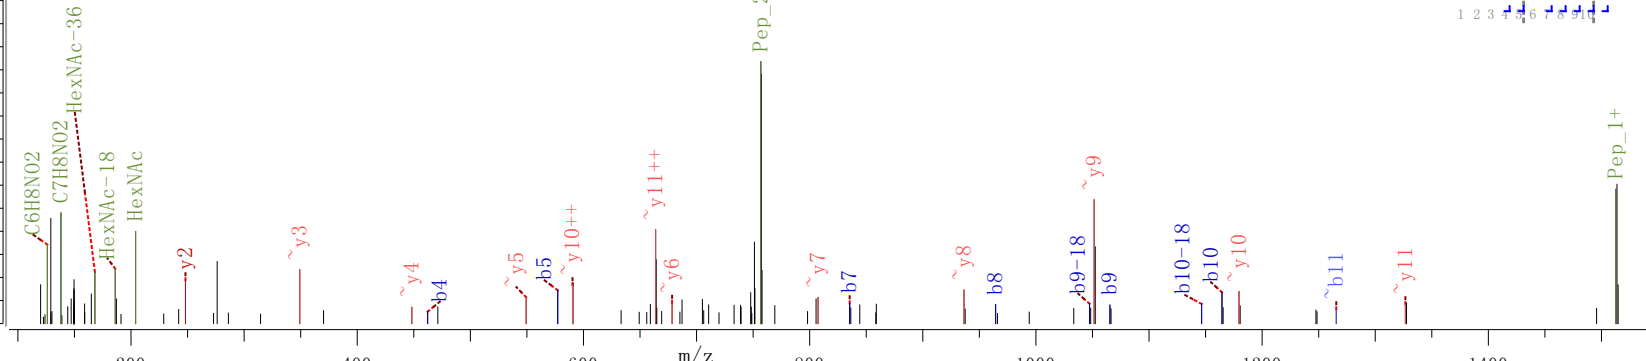

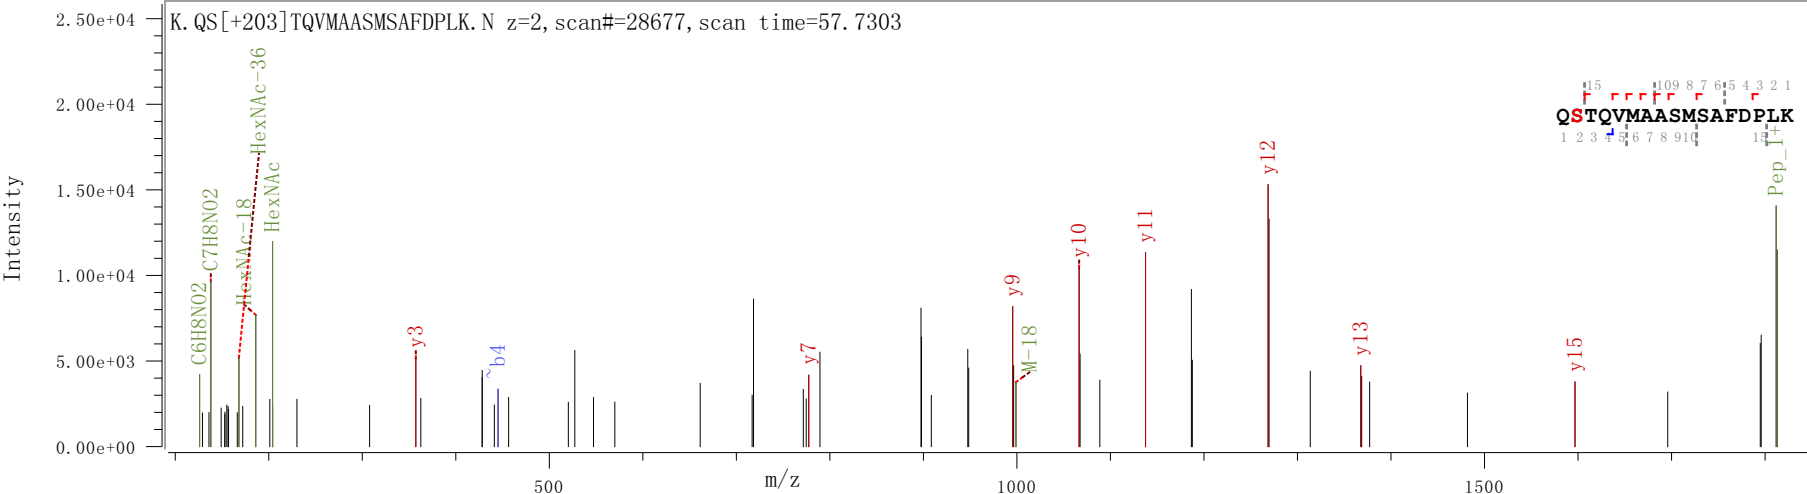

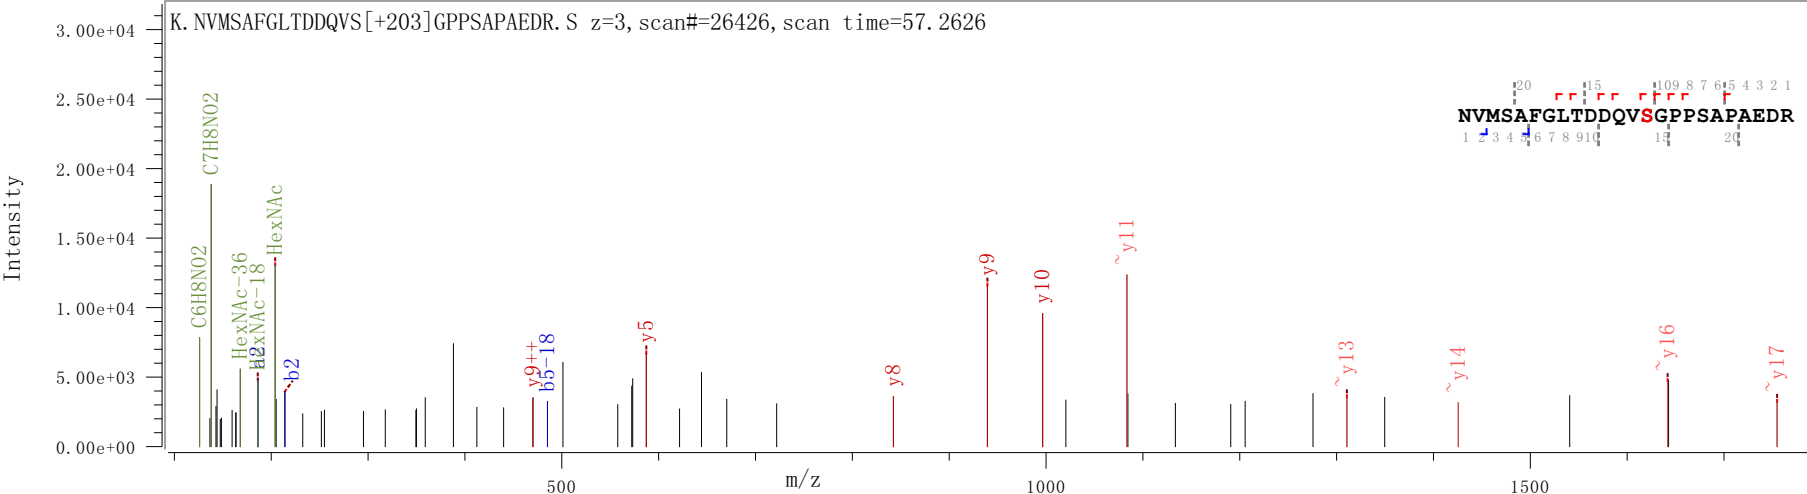

Supplement: supp_RA119.009085_145176_2_supp_391335_pxg0mq.pdf [file supp_RA119.009085_145176_2_supp_391335_pxg0mq.pdf]
